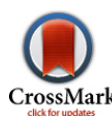

# In Vitro Study of Novel Collagenase (XIAFLEX®) on Dupuytren's Disease Fibroblasts Displays Unique Drug Related Properties

Farhatullah Syed<sup>1,2\*</sup>, Alexis N. Thomas<sup>1\*</sup>, Subir Singh<sup>1</sup>, Venkatesh Kolluru<sup>1</sup>, Susan G. Emeigh Hart<sup>5</sup>, Ardeshir Bayat<sup>1,2,3,4\*</sup>

**1** Plastic and Reconstructive Surgery Research, School of Translational Medicine, Manchester Interdisciplinary Biocentre, University of Manchester, Manchester, United Kingdom, **2** Inflammation Sciences Group, School of Translational Medicine, University of Manchester, Manchester, United Kingdom, **3** Department of Plastic and Reconstructive Surgery, University Hospital South Manchester NHS Foundation Trust, Wythenshawe Hospital, Manchester, United Kingdom, **4** Manchester Academic Health Science Centre, University Hospital South Manchester NHS Foundation Trust, Wythenshawe Hospital, University of Manchester, Manchester, United Kingdom, **5** Auxilium Pharmaceuticals, Inc, Malvern, Pennsylvania, United States of America

## Abstract

Dupuytren's disease (DD) is a benign, fibroproliferative disease of the palmar fascia, with excessive extracellular matrix (ECM) deposition and over-production of cytokines and growth factors, resulting in digital fixed flexion contractures limiting hand function and patient quality of life. Surgical fasciectomy is the gold standard treatment but is invasive and has associated morbidity without limiting disease recurrence. Injectable Collagenase *Clostridium histolyticum* (CCH) - Xiaflex® - is a novel, nonsurgical option with clinically proven *in vivo* reduction of DD contractures but with limited *in vitro* data demonstrating its cellular and molecular effects. The aim of this study was to delineate the effects of CCH on primary fibroblasts isolated from DD and non-DD anatomical sites (using RTCA, LDH, WST-1, FACS, qRT-PCR, ELISA and In-Cell Quantitative Western Blotting) to compare the efficacy of varying concentrations of Xiaflex® against a reagent grade Collagenase, Collagenase A. Results demonstrated that DD nodule and cord fibroblasts had greater proliferation than those from fat and skin. Xiaflex® exposure resulted in dose- and time-dependent inhibition of cellular spreading, attachment and proliferation, with cellular recovery after enzyme removal. Unlike Collagenase A, Xiaflex® did not cause apoptosis. Collagen expression patterns were significantly ( $p < 0.05$ ) different in DD fibroblasts across anatomical sites - the highest levels of collagen I and III were detected in DD nodule, with DD cord and fat fibroblasts demonstrating a smaller increase in both collagen expression relative to DD skin. Xiaflex® significantly ( $p < 0.05$ ) down-regulated ECM components, cytokines and growth factors in a dose-dependent manner. An *in vitro* scratch wound assay model demonstrated that, at low concentrations, Xiaflex® enabled a faster fibroblast reparatory migration into the wound, whereas, at high concentrations, this process was significantly ( $p < 0.05$ ) inhibited. This is the first report elucidating potential mechanisms of action of Xiaflex® on Dupuytren fibroblasts, offering a greater insight and a better understanding of its effect in DD.

**Citation:** Syed F, Thomas AN, Singh S, Kolluru V, Hart SGE, et al. (2012) In Vitro Study of Novel Collagenase (XIAFLEX®) on Dupuytren's Disease Fibroblasts Displays Unique Drug Related Properties. PLoS ONE 7(2): e31430. doi:10.1371/journal.pone.0031430

**Editor:** Maria A. Deli, Biological Research Center of the Hungarian Academy of Sciences, Hungary

**Received:** August 1, 2011; **Accepted:** January 8, 2012; **Published:** February 24, 2012

**Copyright:** © 2012 Syed et al. This is an open-access article distributed under the terms of the Creative Commons Attribution License, which permits unrestricted use, distribution, and reproduction in any medium, provided the original author and source are credited.

**Funding:** Auxilium Pharmaceuticals donated Xiaflex® to allow this research to be undertaken. No additional external funding was received for this study from Auxilium or other external sources. Auxilium had no role in study design, data collection and analysis, decision to publish, or preparation of the manuscript.

**Competing Interests:** The authors have the following competing interest: Auxilium Pharmaceuticals donated Xiaflex®, SH was in the employment of Auxilium Pharmaceuticals at the time the project was undertaken. There are no patents, products in development or marketed products to declare. This does not alter the authors' adherence to all the PLoS ONE policies on sharing data and materials, as detailed online in the guide for authors.

\* E-mail: Ardeshir.Bayat@manchester.ac.uk

These authors contributed equally to this work.

## Introduction

Dupuytren's Disease (DD) is a common, benign, fibroproliferative disorder affecting the palmar fascia of the hands, resulting in progressively disabling fixed flexion deformities of the digits [1–4]. It is of controversial aetiology [5], and the reported associations identified to date are of varying significance including genetic inheritance [6,7], smoking [8], diabetes mellitus [9,10], alcohol consumption [11], hyperlipidaemia [12], anti-epileptic medications [13], localised trauma [14] and occupational vibration exposure [15].

DD is primarily a disease affecting older Caucasian males of Northern European descent, with a male to female ratio of between 5:1 and 15:1 [16]. The classical presentation of DD is

from the fifth decade onwards [2] with a markedly higher prevalence within the British, North American, Scandinavian and Australasian populations [17]. The complex aetiological picture is mirrored by the incomplete multi-factorial pathophysiological model - DD manifests with a tripartite natural history of myofibroblast proliferation (resulting in nodule formation), cytokine- and mechanically-triggered actin microfilament contraction coupled with extracellular matrix (ECM) remodelling (with ensuing development of shortening fascial bands) and nodule regression, leaving the inelastic, tendon-like cords which result in the classically-described digital flexion contractures [2,18–21].

Treatment of DD is not curative but rather aims to restore hand function. Currently, the gold standard remains surgical correction

of the deformity but a variety of non-surgical treatments have been investigated. To date, the use of Collagenase Clostridium *Histolyticum* (CCH) has shown the most promise [22,23]. The CCH family, first discovered by Maclennan in 1953, comprises a group of matrix metalloproteases that digest the triple-helical structure of collagen under physiological conditions. They have had an extensive history of laboratory utilisation but are becoming increasingly of interest in the therapeutic management of a variety of fibrotic disorders, to date most successfully in the amelioration of palpable DD cords [22–24]. They contain both class I and class II collagenolytic enzymes, which act to rapidly digest triple-helical collagens into small peptides [25,26]. A variety of reagent grade collagenases have been available on the market however, while useful in the laboratory, these have not had a fixed ratio of class I to class II component-CCHs, leading to difficulties with achieving a reproducible therapeutic *in vivo* effect. Xiaflex® solves this issue with a constant I:II (AUX-I:AUX-II) collagenase class ratio (each of which is a product of a separate bacterial gene, *colG* and *colH* respectively) [27], which is thought to increase its targeted effectiveness and reliability via the synergistic activity of its contained collagenases. The class I collagenase is a single polypeptide chain containing approximately 1000 amino acids of known sequence and with a molecular weight of 114 kDa. The class II collagenase is also approximately 1000 amino acids long and has a molecular weight of 113 kDa. Respectively, these enzymes differ from each other in terms of domain structure, substrate affinity, catalytic efficiency and preferred cleavage site on the collagen molecule [22,23,28–33]. *In vivo* results (phase 1–3 clinical trials [31–35] and the successful achievement of FDA approval [36]) have shown good therapeutic short- to mid-term effects in the non-operative amelioration of palpable DD cord contractures [22], although recurrence rates have been shown to be higher than those observed following surgical excision of the diseased tissues. Interestingly, to date, there have been no *in vitro* studies published demonstrating the effect of Xiaflex® at the cellular or molecular level.

CCHs act on collagen, the major structural component of connective tissues and perhaps the most abundant protein in the animal world. Twenty-eight types of collagen have been described and have been grouped based on structure and function into eight distinct classes – however, the major human structural forms are the fibrillar collagens types I, II and III. Each consists of three triple helical polypeptide  $\alpha$ -chains: type I collagen =  $\alpha$ 1(I),  $\alpha$ 1(I),  $\alpha$ 2 and type III collagen =  $\alpha$ 1(III),  $\alpha$ 1(III),  $\alpha$ 1(III) [37,38,39,40]. It is unclear which local factors govern the abnormal DD ratio of type III to type I collagen in DD cord tissue compared to normal palmar fascia. An increase in both total collagen in DD tissue and in the ratio of type III to type I collagen has been consistently

demonstrated [19,41]. Additionally, the collagen produced has a higher degree of post-translational modification (hydroxylation and/or glycation of lysine and proline side chains) than is found in normal palmar fascia [19,41]. The over-expression of type III to type I collagen becomes more apparent in DD progression from normal (control) palmar fascia through to mildly involved fascia and to DD nodules, but type III prevalence decreases in the evolution from nodules to DD cords [19].

Morphologically, the major difference between normal and DD palmar fascia is a 4- to 20-fold increase in DD fascia fibroblast density [42,43]. Collectively, these changes indicate that DD represents a localised increase in collagen turnover and remodeling, a process analogous to that which occurs during physiological wound healing [18–20].

The effects of collagenase on the collagenous components of DD cords (with morphologic sparing of cellular elements) [44] has been well described in *in vitro* explant cultures [33,44]. However, there has been little published to date regarding the functional effects of CCH on DD tissue at a cellular level. The aim of this study was to investigate, using *in vitro* assays, the functional effects of Xiaflex® and Collagenase A on fibroblasts cultured from DD Nodule, DD Cord, surrounding perinodular Fat and overlying Skin which were compared to control fascial, skin and fat fibroblasts (from carpal tunnel release patients), focusing on fibroblast adhesion, proliferation, apoptosis, migration and gene expression.

## Materials and Methods

### Participant Selection

This study was conducted in accordance with the ethical principles of Good Clinical Practice and the Declaration of Helsinki. This study received ethical approval from the local research committee (Manchester, UK) and all subjects gave full written, informed consent.

Participants were drawn from a cohort of day-case procedures performed at University Hospital South Manchester NHS Foundation Trust and Salford Royal NHS Foundation Trust, Manchester, UK. Patients with DD requiring fasciectomy or dermofasciectomy and those undergoing carpal tunnel release (screened prior to selection to ensure they were DD-free based on history, lack of family history of DD and clinical examination) were recruited to provide the study subjects respectively. Table 1 demonstrates DD (n = 25) and CT (n = 6) patient demographics and relevant DD risk factor exposure. Control subjects with history of fibrosis and/or family history of DD were excluded.

### Sampling procedure

In the DD cases (n = 25), the palmar and digital DD-affected tissues were therapeutically excised. Tissues from the Nodule, Cord, peri-nodular Fat and surrounding Skin were carefully dissected, separated and immediately placed aseptically into complete Dulbecco's Modified Eagle Medium (cDMEM) (Sigma-Aldrich, UK) – this contained Dulbecco's Modified Eagle Medium (DMEM) plus 1 mL Primocin (InvivoGen, UK), 5 mL non-essential amino acids (Sigma-Aldrich, UK), 5 mL L-glutamine (PAA, UK) and 50 mL (10%) fetal bovine serum (FBS) (PAA, UK) per 500 mL of DMEM. Control Skin, palmar Fascia and Fat were harvested from subjects undergoing carpal tunnel release (n = 6). Control tissue was carefully excised and again placed aseptically into cDMEM. All samples were refrigerated at 4°C. The tissue samples were processed within 12–16 hours subsequent to tissue harvest during the surgical procedure (Figure 1).

**Table 1.** Demographic data of DD and control subjects.

| Characteristics             | Patients with Dupuytren's Disease | Controls subjects undergoing Carpal Tunnel Release |
|-----------------------------|-----------------------------------|----------------------------------------------------|
| Total number                | 25                                | 6                                                  |
| Gender (Male/Female)        | 20/5                              | 4/2                                                |
| Race or Ethnicity           | Caucasian                         | Caucasian                                          |
| Age, Year, Mean             | 66.3                              | 70                                                 |
| Age range (Year)            | 39–80                             | 41–70                                              |
| Positive family history (%) | 13 (52)                           | 0 (0)                                              |

doi:10.1371/journal.pone.0031430.t001

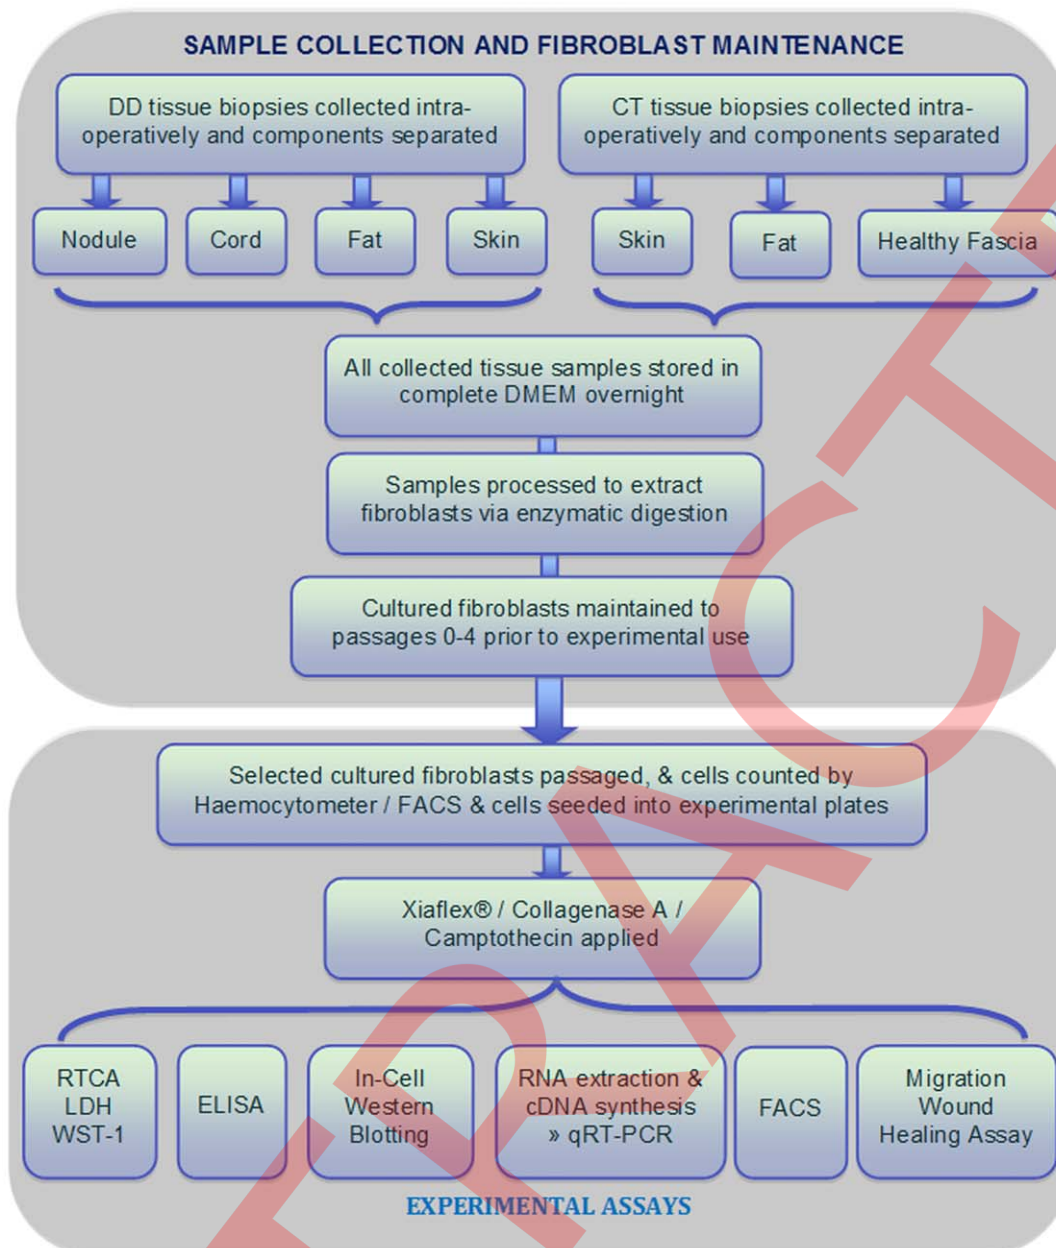

**Figure 1. Flowchart demonstrating the tissue collection, processing and experimental strategy used in this study.**  
doi:10.1371/journal.pone.0031430.g001

### Tissue Processing

Each tissue type was processed using previously described cell culture techniques [45] to allow growth of each tissue component i.e. Cord, Nodule, Fat, non-diseased Fascia and Skin. Tissue handling and cell culture experiments were undertaken within a class 2 biological containment extractor hood to limit bacterial or fungal contamination. Briefly, each sample was washed with PBS (Sigma-Aldrich, UK) prior to being minced with a small quantity of Collagenase A (10 mg/mL, Roche, UK) and incubated for 2–3 hours in a 37°C water bath, with a sufficient volume of Collagenase A to lyse the tissue. The tissue lysis reaction was arrested using equal amounts of cDMEM and the resultant cell suspension was centrifuged. The supernatant was removed and the cell pellet was re-suspended in 1 mL cDMEM, this was then added to a T-25 Corning CellBind flask (Corning Life Sciences,

UK). A further 4 mL cDMEM was added and the flask was incubated in a 5% CO<sub>2</sub> humidified incubator at 37°C for 1–2 weeks to achieve 80–85% cell confluency. At 85% confluency, this was denoted as passage 0, the cells were passaged for experimental usage (with a small percentage re-seeded into the flasks as passage 1). Passages 0–4 were utilised, following which the cells were destroyed. Throughout the growth period, each flask had the old media removed every 3–4 days, was washed with PBS to remove debris and fresh cDMEM was added. Prior to use in any experiments, the 85% confluent flasks were serum-starved by incubating overnight with 0.1% FBS in DMEM to ensure all cells were synchronized within the G<sub>0</sub> cell-cycle (cell synchrony is required to study the progression of cells through the cell cycle prior to subjecting them to any drug treatment). Following this, the cells were trypsinised into suspension, counted using a haemocy-



tometer and defined volumes containing  $1.5 \times 10^4$  cells were calculated for each sample.

### Xiaflex® versus Collagenase A

The relative and dose-dependent effects of Xiaflex® (Auxilium Pharmaceuticals, USA) and a commercially available reagent grade collagenase, Collagenase A (Roche Diagnostics, UK), on DD and CT primary cultured fibroblasts from each anatomical site were assessed. The following enzyme concentrations were compared: No Xiaflex® or Collagenase A (untreated); Collagenase A 250, 750 and 1000 ng/mL (designated as Col-250 ng; Col-750 ng and Col-1000 ng); Xiaflex® 300, 400, 500, 600, 700 ng/mL (designated as Xia-300 ng; Xia-400 ng; Xia-500 ng; Xia-600 ng and Xia-700 ng). Camptothecin 250 ng/mL was used as a positive control for RTCA, LDH, WST-1 and apoptotic endpoint assays (Figure 1) due to its well-documented inhibitory effect on growth and proliferation and its positive apoptotic effect.

### Composition of serum free supplemented media for the study and for drug dilution

A variety of media were evaluated in the pre-study methodological pilots. Two were found to provide the best environment for cell growth and maintenance while not affecting the action of either enzyme. These were serum-free Dulbecco's Modified Eagle's Medium/Ham's F12 (50:50) (supplemented with 10 mM HEPES, 50 µg/mL ascorbic acid, 100 µM adenine, 0.5 µM hydrocortisone, 0.1 nM cholera toxin, 100 U/mL penicillin and 10 g/mL streptomycin (Sigma-Aldrich, UK) (known hereafter as supDMEM) [46] and William's E medium (supplemented with 10 µg/mL of insulin, 10 ng/mL of hydrocortisone, 2 mmol/L of l-glutamine, 100 IU/mL penicillin and 10 g/mL streptomycin (Sigma-Aldrich, UK) (referred to hereafter as supWille) [47]. For all the experiments, the enzymes were diluted in these media and their effect compared.

### Real-Time Cellular Analysis (RTCA)

The xCELLigence System (Roche Applied Science, Germany and ACEA Biosciences USA) allows real time cell analysis (RTCA) via a system consisting of a microelectronic sensory array (MESA) 96 well plate coupled with a device station and an electronic sensor analyser. The basic principle of the RTCA system is to monitor the changes in electrode impedance by the interaction between adherent multiplying cells seeded into the MESA wells and the underlying well microelectrodes. The ionic environment, both at the electrode/solution interface and in the surrounding solution, determines the electronic impedance of each electrode. When an electric field is applied, ions undergo field-directed movement coupled with concentration gradient-driven diffusion, leading to frequency-dependent impedance dispersion. The cell number, viability, morphology and degree of adherence of cells in contact with the electrodes will affect the local ionic environment leading to an increase in the electrode impedance - this is represented as the Cell Index (CI) and reflects a calculation (via an internal system algorithm) of frequency-dependent electrode impedance with or without attached healthy cells present on the surface of the wells (Supplementary Figure S1) [48,49].

For each experiment, a MESA plate was prepared with 50 µl of either supDMEM or supWille added to each well and the plate re-incubated for temperature equilibration and plate calibration. Defined volumes of passaged cell suspensions containing  $1.5 \times 10^4$  cells were added to each well. The plate was then inserted into the RTCA machine (housed within the incubator) and CI values assessed every 15 min over the following 7–8 hours (allowing cell attachment, spreading and growth).

After 7–8 hours the plate was removed, washed once with PBS (Sigma-Aldrich, UK) to remove any cell debris and either Xiaflex® or Collagenase A (at varying concentrations as described above) was added to each well. The plate was reinserted into the RTCA system and the CI further assessed every 15 min for the next 24 hours. Following this 24 hour period, the medium containing the enzymes was removed, the wells were again washed once with PBS and fresh supDMEM or supWille added to all wells. The plate was then reinserted into the RTCA system for a minimum of a further 24–30 hours to assess the degree of cellular recovery in the absence of Xiaflex® or Collagenase A.

### Cytotoxicity, Cell Death and Cell Viability/Metabolic Activity Assay (LDH/WST-1)

Synchronized cells were passaged for cell suspensions and plated, with  $1.5 \times 10^4$  cells per well, onto a 96 well plate. The cells were grown for 7–8 hours, after which Xiaflex® or Collagenase A (at the concentrations described above) were applied and the cells grown for 24 hours in the presence of either enzyme. Treated cells and media were then collected, following which lactate dehydrogenase (LDH) and water soluble tetrazolium salt-1 (WST-1 [containing 4-[3-(4-iodophenyl)-2-(4-nitrophenyl)-2H-5-tetrazolio]-1,3-benzene disulfonate]) assays were performed to assess cell membrane integrity, cellular viability and cell metabolic activity, using the standard protocol as described by the manufacturer's instructions (Roche, UK). The remaining treated cells were allowed to grow further following the removal of the enzymes, with fresh enzyme-free media applied to study the reversibility of the enzyme effects. The remaining media and cells were then collected after 24–30 hours of further cell growth, following which LDH and WST-1 assays were performed.

### RNA Extraction, cDNA synthesis and qRT-PCR

$1.5 \times 10^4$  cells from different anatomical sites, following exposure to the various CCH enzymes (at the concentrations previously noted), were collected in 300 µl of Trizol (Invitrogen, UK), mixed well with 0.2 mL chloroform and left at room temperature for 2 min. The mixture was then spun at 13,000 rpm for 15 min. The upper aqueous layer was collected in RNA-free eppendorf tubes and mixed with an equal volume of 70% ethanol, then further processed with an RNeasy kit (Qiagen, UK) to extract total RNA (as per the manufacturer's instructions). DNase treatment was then carried out using a DNasefree kit (Ambion, UK) as per the manufacturer's protocol. The NanoDrop ND-1000 UV-visible spectrophotometer (Labtech International, UK) was then used to estimate the total RNA concentration. RNA was normalised for all the cells samples to 500 ng for the cDNA synthesis. qScript™ cDNA SuperMix (Quanta Biosciences, USA) was used for cDNA synthesis. Quantitative polymerase chain reactions were carried out in real-time using the LightCycler®480 II platform (Roche, UK). Each qRT-PCR reaction was carried out in a final volume of 10 µL, consisting of 4 µL diluted template cDNA, 5 µL Light Cycler 480 probes master mix (Roche Diagnostics, UK), 0.2 µM of forward and reverse primer (Supplementary Table S1) (Sigma-Aldrich, UK), 1 µL probe from Universal Probe Library (Roche Diagnostics, UK) and 0.5 µL nuclease-free water (Ambion, UK). Each reaction was done in triplicate. White 96-well plates (Roche Diagnostics, UK) were used for all the experiments. The quantitative real-time polymerase chain reaction (qRT-PCR) reactions were initiated at 95°C for 10 minutes to activate the Hot Start Taq polymerase. Each of the 40 amplification cycles consisted of a 10-second denaturation step at 95°C and a 30-second annealing and elongation step at 60°C. The fluorescence intensity was recorded at the end of the annealing step and

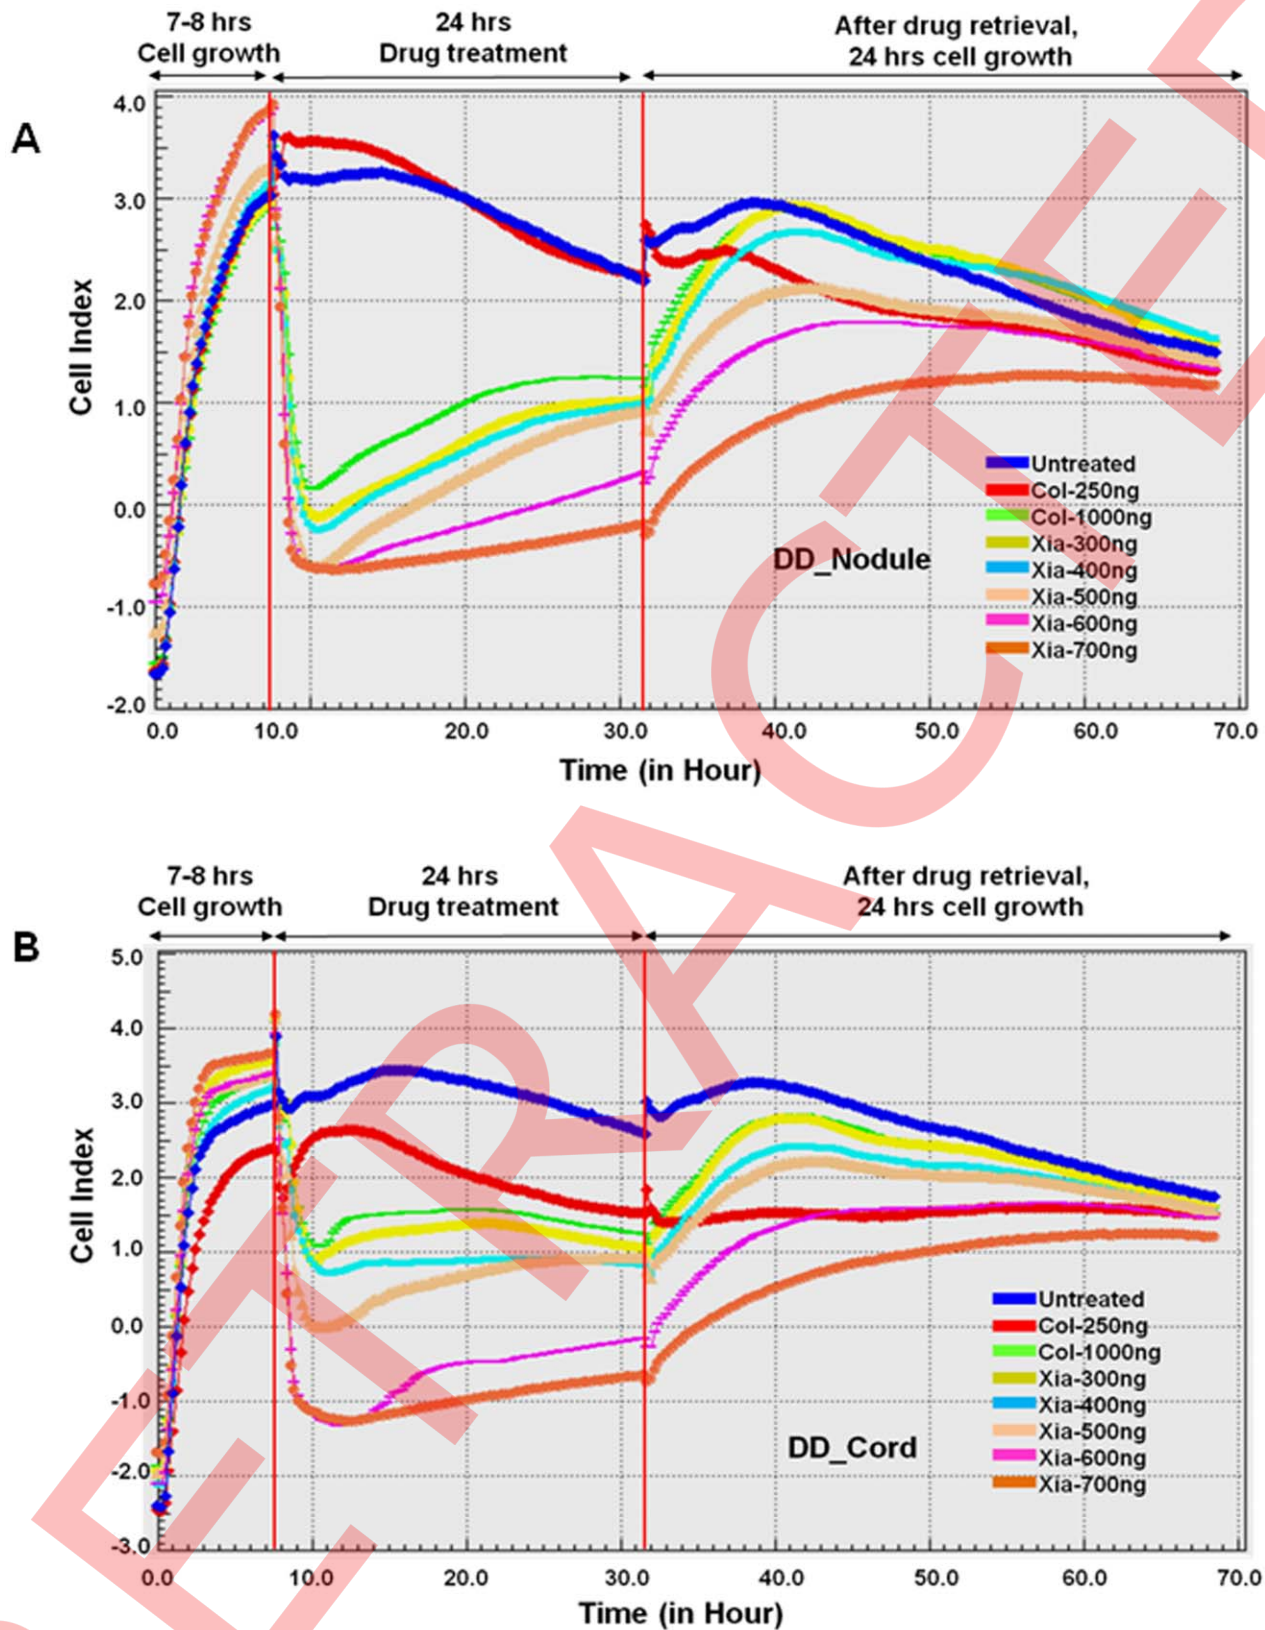

**Figure 2. Real-Time Monitoring of Xiaflex® and Collagenase A effect on DD primary fibroblasts from different anatomical sites using MESA.** Primary fibroblasts of DD (Nodule, Cord, Fat and Skin) were seeded onto the E-plate and cells were allowed to grow prior to the introduction of Xiaflex® and Collagenase A at various concentrations. After drug addition, cells were allowed to grow for 24 hours in the presence of drugs. After 24 hrs, the drugs were removed and the cells were fed with fresh supWille media for 24 hrs to assess the reversibility of the inhibitory effect of the drugs. Cell Indexes were recorded every 15 minutes. Each trace at each concentration was an average of three replicates. **A.** Effect of Xiaflex® and Collagenase A on DD-Nodule. **B.** Effect of Xiaflex® and Collagenase A on DD-Cord.  
doi:10.1371/journal.pone.0031430.g002

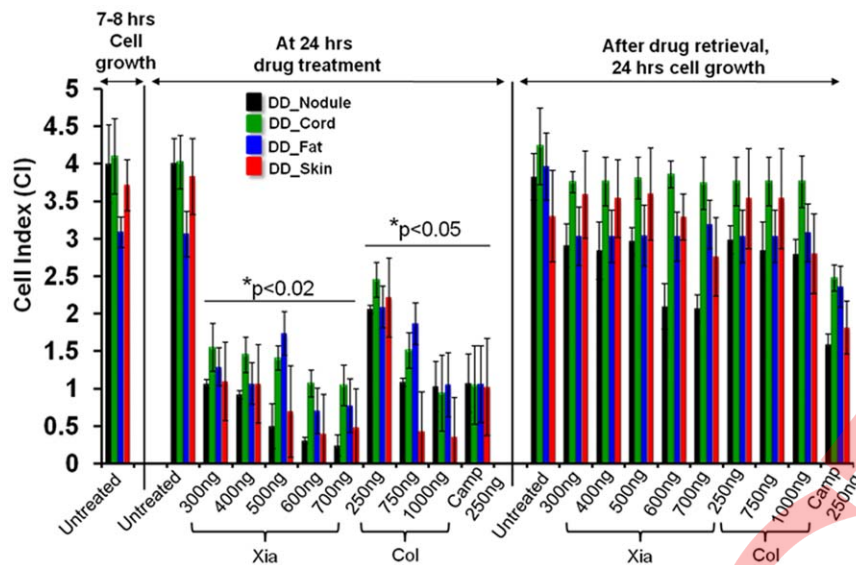

**Figure 3. Real-Time Cell Analysis (RTCA) monitoring of Xiaflex® and Collagenase A effects on DD-primary fibroblasts obtained from different anatomical sites.** This diagram demonstrates average cell indices (CI) of untreated and treated cell groups taken from six independent RTCA experiments, which have been plotted. doi:10.1371/journal.pone.0031430.g003

elongation step in each cycle. After the 40 cycles of amplification, a cooling step at 40°C for 30 seconds was carried out. The gene expression levels were normalised with an average of two internal reference genes, ribosomal protein L32 (RPL32) and succinate dehydrogenase complex subunit A (SDHA) [50].

#### Enzyme Linked Immunosorbent Assay (ELISA) for Collagen I and III Detection

DD fibroblasts from different anatomical sites were grown in cDMEM to 80–85% confluency, following which  $1.5 \times 10^4$  cells were plated onto 96 well plates. After 7–8 hours cell attachment, the various concentrations of Xiaflex® and Collagenase A were applied for 24 hours. Treated and control untreated cells were collected in PBS and stored at  $-80^\circ\text{C}$  until utilised. Collagen I was measured using a novel capture sandwich ELISA (developed in-house) and collagen III was measured using indirect ELISA (standardised in-house) as described previously [50,51].

#### High Throughput In-Cell Western Blotting and Quantitation

80–85% confluent DD and CT cells were starved in 0.1% serum DMEM for 24 hours, then trypsinised and counted using FACS (Accuri C6 Flow Cytometry System, UK), with  $1.5 \times 10^4$  cells inoculated into each well of a 96 well plate. The cells were grown to confluence over 8 hours, washed with PBS, the previously described enzyme concentrations were then applied and the plates re-incubated for 24 hours. After 24 hours treatment, the cells were washed once with PBS, then fixed using 4% formaldehyde for 1 hour at room temperature. Following adequate fixation, In-Cell Western blotting was carried out as described previously [50,52–54]. Beta-actin was used as a loading control. The panels of primary and secondary antibodies used in this study are listed in the supplementary Tables S2 and S3.

#### Measurement of Early Apoptosis by Annexin V Staining

Suspensions of  $1.5 \times 10^4$  cells/well of DD or CT fibroblasts were seeded as previously described onto 6-well tissue culture plates (Corning, UK). Cells were grown for 7–8 hours, following which the same concentrations of Xiaflex® and Collagenase A were applied.

An AnnexinV-fluorescein isothiocyanate (AnnexinV-FITC) and propidium iodide (PI) labelled Apoptosis/Necrosis Detection Kit (Abcam, UK) was utilised according to the manufacturer's instructions. After 24 hours treatment, the cells were harvested and AnnexinV-FITC was added to a final concentration of 2.5 mg/ml. To detect necrotic cells PI was added at 5 mg/ml concentration. The AnnexinV-FITC and PI-labelled cells were analysed by FACS (Accuri C6, Flow Cytometry System, UK). Using flow cytometry, dot plots of AnnexinV-FITC on the X-axis against PI on the Y-axis were used to distinguish viable cells (which are negative for both PI and AnnexinV-FITC), early apoptotic cells (which are Annexin V positive cells, but PI negative) and late apoptotic or necrotic cells (which are positive for both PI and AnnexinV-FITC staining). Non-stained cells and untreated cells were used as negative controls. The resultant data was analysed using CFlow plus software (Accuri C6, Flow Cytometry System, UK).

#### In Vitro Scratch Wound Healing Assay

DD fibroblasts were seeded uniformly ( $5 \times 10^4$  cells/well) onto 6-well plates and grown to 100% confluency. A wound scratch was made across the centre of each well using a sterile 200 mL pipette tip and any non-adherent cells were washed off. The previously described concentrations of either Xiaflex® or Collagenase A were then added and the plates incubated for 24 hours. Cellular fixation was achieved using 4% formaldehyde/PBS (Sigma-Aldrich, UK) applied for 30 mins at room temperature, following which the cells were made permeable with PBS/0.1% Triton X-100 solution (Sigma-Aldrich, UK). The cells were then stained with Rhodamine phalloidin-TRITC (tetramethyl-rhodamine isothiocyanate) (Sigma-Aldrich, UK) - this stains the F-actin red, showing any actin stress fibres within the cells - and 4',6-diamidino-2-phenylindole (DAPI) (Sigma-Aldrich, UK) - this binds to DNA which preferentially stains the nucleic double-stranded DNA fluorescent blue, showing the cellular nuclei. For each stained well, four micrographs were taken at 40X magnification from four different areas using inverted Olympus IX71 microscopy (Olympus, UK) and the number of cells that had migrated to the wound area were counted and plotted graphically.



A

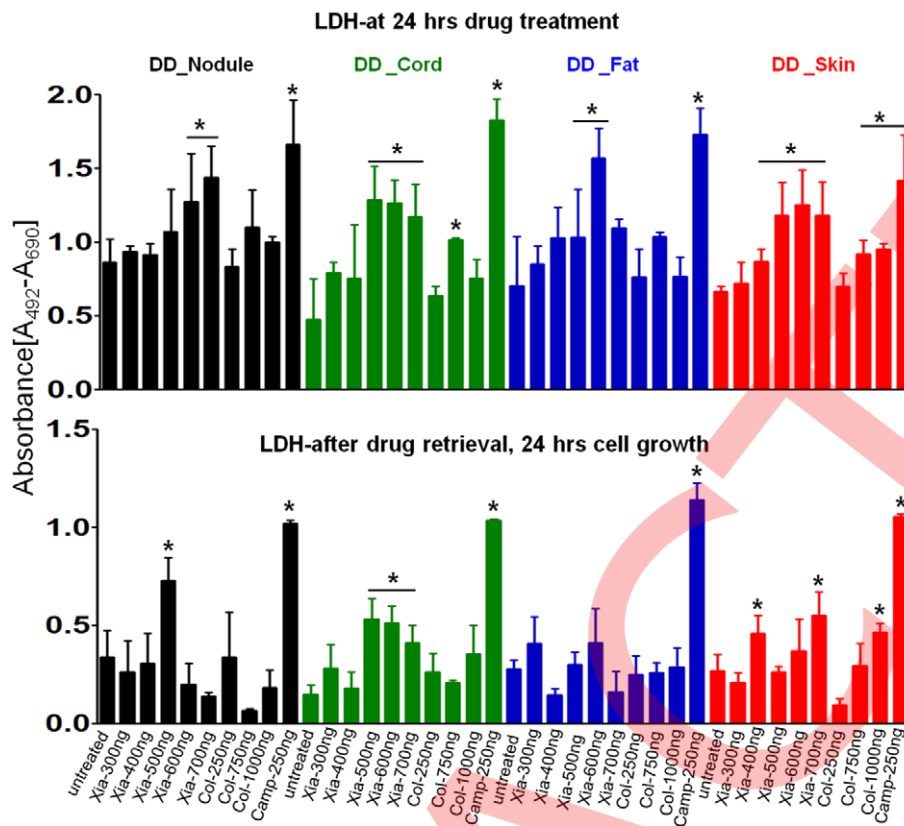

B

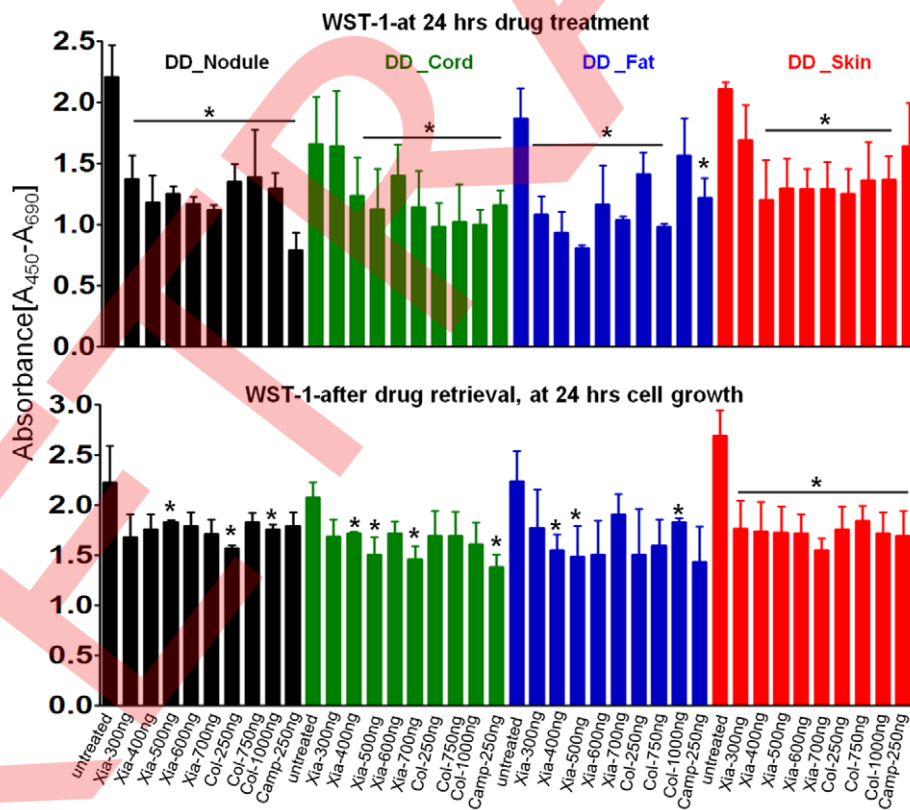

**Figure 4. Effect of Xiaflex® and Collagenase A on cell membrane integrity (cytotoxicity detection) and cell viability/metabolic activity measured by LDH and WST-1 assays. A.** LDH (lactose dehydrogenase) leakage assay for cell membrane integrity assessed the cytotoxic effect of the drugs. **B.** WST-1 (water soluble-tetrazolium salt-1) assayed for cell viability/metabolic activity and cell death. \* $p < 0.05$ , indicates significant difference compared to untreated group. The data was expressed as average means  $\pm$  SEM from four independent experiments. doi:10.1371/journal.pone.0031430.g004

### Statistical Analysis of Data Sets

Each experiment was performed independently a minimum of 3 and up to 6 times to ensure reproducibility. Data were expressed as mean  $\pm$  SEM. Statistical evaluation of the continuous data was performed by one-way analysis of variance, followed by Dunnett's t-test for between-group comparisons. Statistical analyses were performed using the SPSS 13.0 software program (SPSS Inc., Chicago, IL, USA). All differences with  $p < 0.05$  were considered statistically significant. One representative data set from each of the 3–6 independent experiments or an average data set of all 3–6 experiments is presented where appropriate (error bars represent SEM).

## Results

### Dose- and Time-Dependent Inhibition of Cell Attachment, Spreading and Proliferation by Xiaflex® and Collagenase A

A pilot experiment assessing the validity of the methodology demonstrated that the method required optimisation, therefore a number of experiments were undertaken to establish the most appropriate media for use as a diluent and the optimum cell seeding density. The first pilot assessed the effect of Xiaflex® or Collagenase A diluted in cDMEM (i.e. with 10% FBS additive) to the desired concentrations (as described in the methods section). As expected, the presence of 10% FBS inhibited the action of both Xiaflex® and Collagenase A, with neither demonstrating an effect at any tested concentration on DD nodule (Supplementary S2A) and DD cord (Supplementary Figure S2B). In light of this, the concentration of FBS added to the DMEM media was varied (to 1%, 2% and 5%) and the effect of this on cell growth and on the action of both enzymes assessed. At the lower percentage FBS concentrations, there were insufficient nutrients to support adequate cell adhesion and growth (as demonstrated by much lower cell index (CI) plots) and at the higher FBS concentrations, the action of both enzymes was inhibited (data not shown). Following this, a trial of FBS-free supplemented DMEM (supDMEM) or supplemented William's E (supWille) media as the enzyme vehicle was undertaken. As in the earlier experiments, the FBS-free supDMEM with the varying concentrations of the enzymes did not provide sufficient nutrients for cell growth and thus it could not be used to determine the effect of either Xiaflex® or Collagenase A on cell viability. However, those cells exposed to the enzymes diluted in supWille media showed much higher CI values compared with supDMEM, allowing satisfactory comparison of the effects of both enzymes (see Supplementary Figure S3). For this reason, all subsequent experiments utilised supWille medium alone. Having determined the optimal culture medium to support both, cell growth and enzyme activity, the next pilot investigated the optimal density of cells seeded into each MESA plate well. Fibroblast suspension densities of  $0.5 \times 10^4$ ,  $1 \times 10^4$ ,  $1.5 \times 10^4$  and  $2 \times 10^4$  cells/well were assessed, with  $1.5 \times 10^4$  cells/well demonstrating the best total CI and CI increase (i.e. the highest overall monolayer density and greatest cell proliferation over the experimental period) (data not shown). The pilot results showed the variable effect of Collagenases at different cell densities - at higher densities ( $2 \times 10^4$ – $2.5 \times 10^4$  cells/well) of cells, the effects of both Xiaflex® and Collagenase A were reduced as compared to

those noted with lower cell densities ( $1$ – $1.5 \times 10^4$  cells/well in a 96well plate) (data not shown).

Baseline cell attachment, spreading and proliferation characteristics (in the absence and presence of either Xiaflex® or Collagenase A) were evaluated by RTCA for fibroblasts isolated from the various tissue types (see Figure 2, Figure 3 and Supplementary Figures S4A & S4B for DD and Supplementary Figures S5 A–C and Figure S6 for CT). Prior to treatment with the drugs, there were obvious differences in the attachment, spreading and proliferation rates of the cell types: in DD, Nodule and Cord showed higher growth than Fat and Skin (as shown by cell indexes (CI) – Nodule =  $4.1 \pm 0.5$  and Cord =  $4.15 \pm 0.4$  versus Fat =  $3.1 \pm 0.4$  and Skin =  $3.75 \pm 0.6$  respectively); comparatively, in CT, Fat and Skin showed better growth than Fascia (CI of Fat =  $5.15 \pm 0.1$  Skin =  $4.25 \pm 0.2$  and Fascia =  $1.25 \pm 0.3$  respectively). The greater cell attachment, spreading and proliferation of Nodule and Cord compared with normal Fascia is in keeping with the pathophysiology of this fibroproliferative disease.

Treatment with both Xiaflex® and Collagenase A, caused an overall suppression of cell attachment, spreading and proliferation across all cell types. In DD cells, there was a marked dose-dependent suppression (with a slight anomaly in the suppressive effect of 500 ng Xiaflex® on Fat), with Xiaflex® seen to be more effective at a low concentration (Xia-300 ng) compared with a low-dose Collagenase A (Col-250 ng). Xiaflex® appears to have a greater effect on Nodule compared to Cord cultures - this may tie in with the known pathophysiology of the nodules being the active proliferative disease phase or may be related to higher myofibroblast numbers in nodules compared with other DD anatomical sites. Conversely, and as expected, Camptothecin suppressed all cell types equally. In the control CT cells, again overall, there was a marked suppression of all cell type attachment, spreading and proliferation, although the dose-dependent response was much less marked. As expected, the most significant effect was noted in Fascia samples. In line with the DD results, low dose Xiaflex® had a greater effect than low dose Collagenase A, and Camptothecin suppressed all cell lines (although interestingly to a lesser extent in Fat).

The next stage of the RTCA experiments investigated whether Xiaflex® or Collagenase A had a sustained effect on DD or CT fibroblasts following removal of the enzymes, assessing the cellular recovery in the 24 hour period post-enzyme replacement with fresh supWille. Both DD and CT cell lines recovered from the suppressive effects of both enzymes (although not to the same CI as pre-treatment) and, to a lesser extent, from the cytotoxic Camptothecin. In DD cells, Cord showed a greater recovery of growth than Nodule, with some dose-dependent limitation of recovery in Nodule cells. In CT, Skin and Fat recovered to a much greater extent than Fascia, with no evidence of recovery being drug dose-dependent.

### Xiaflex® and Collagenase A Induce Membrane Leakage and Reduce Cellular Viability/Metabolic activity in DD Fibroblasts

The cytotoxic properties of Xiaflex® and Collagenase A on DD fibroblasts were assessed to corroborate the RTCA results and to gain a more comprehensive understanding of the toxicity profiles displayed by both enzymes. Analysis of cytotoxicity and cell proliferation looked at both membrane disturbance and mito-



A

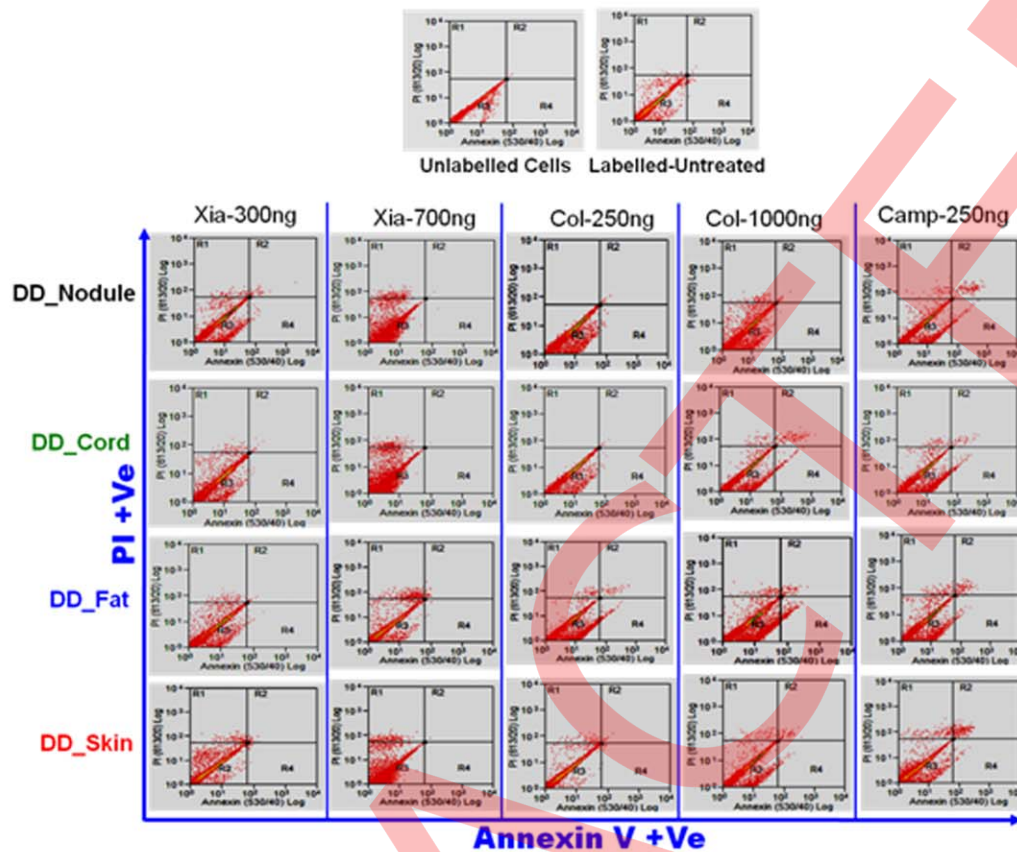

B

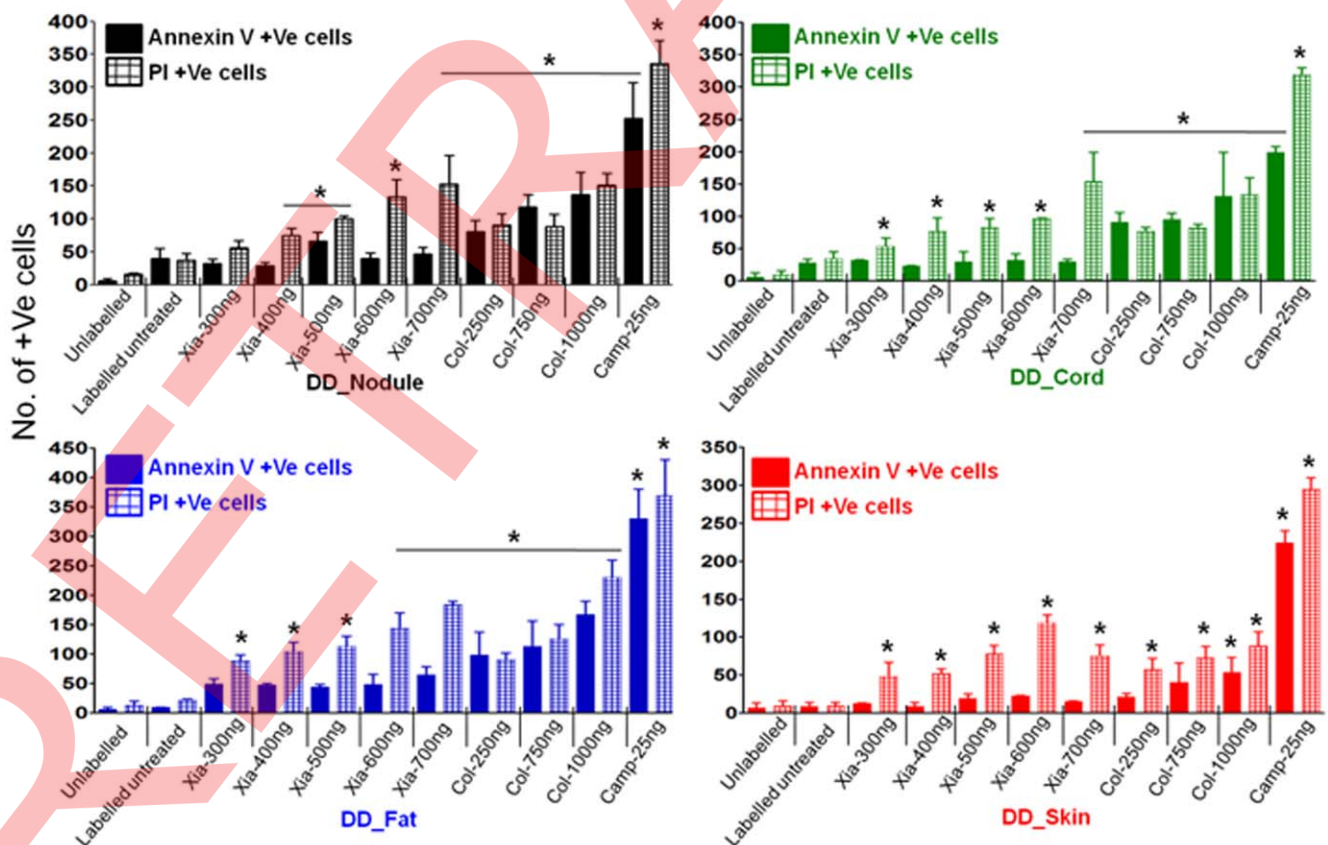

**Figure 5. Detection of Early Apoptosis and Necrosis using Annexin V and PI.** Fibroblasts from different anatomical sites (Nodule, Cord, Fat and Skin) were treated with various concentration of Xiaflex® and Collagenase A as indicated in the graphs. 24 hours post-treatment, cells were harvested and labeled with Annexin V-FITC and PI. **A.** FITC-conjugated annexin V staining for untreated cells, upper left plot (labeled-untreated), compared with the viable control cells, upper right plot (unlabeled cells). Dual-staining of treated cells (lower panel): the quadrant analysis shows viable cells negative for annexin V and PI in the lower left, R3. Apoptotic cells stained with annexin V but excluding PI are shown in the lower right, R4. Secondary necrotic cells (i.e. necrosis after apoptosis) positive for both PI and annexin V are shown in upper right, R2. Necrotic or mechanically damaged cells positive for PI only are shown in upper left, R1. Representative data are shown from three independent experiments in triplicates. **B.** Annexin V and PI positive cells after 24 hrs treatment with Xiaflex® and Collagenase A at various concentrations as indicated in bar graph. Positive cells were counted from three independent experiments and plotted on the graph as an average means  $\pm$  SEM. \* $p < 0.05$ , indicates significant difference compared to untreated group. doi:10.1371/journal.pone.0031430.g005

chondrial activity. An LDH assay (Figure 4A) measured enzyme-induced acute membrane disturbance and a WST-1 assay (Figure 4B for DD and Supplementary Figure S7 for CT) demonstrated the more long-term changes in cell viability/metabolic activity (i.e. mitochondrial dehydrogenase activity). The LDH results for the cytotoxicity of both enzymes show good agreement with the RTCA results. Xiaflex®, after 24 hours of exposure, demonstrates a clear dose-dependent cytotoxic effect on cultured fibroblasts from all anatomical sites. When compared against Collagenase A, the lowest doses of Xiaflex® appear to be more potently cytotoxic than Collagenase A (although this is less apparent than seen via RTCA). Results after a drug-free 24 hour recovery period also demonstrated a primarily dose-dependent cytotoxic response to Xiaflex® with a reduced overall cytotoxicity (in keeping with time-dependent increased cell growth and illustrating the partial reversibility of the cytotoxic effect) but with a greater degree of heterogeneity - Xia-400 ng showed a comparatively greater cytotoxic response in DD-Skin, with similarly enhanced responses to Xia-500 ng in DD-Nodule and DD-Cord versus that seen with Xia-300 ng in DD-Fat. Collagenase A showed a reduced cytotoxicity (and hence reversibility of effect) post drug removal across all the anatomical sites, although there was a less-demonstrable dose-dependency. Finally, as expected, the positive control Camptothecin showed strong cytotoxicity at 24 hours of exposure across all anatomical sites, with a minimal reduction in cytotoxic effect seen despite the 24 hour drug-free recovery period.

Moving to the WST-1 viability/metabolic activity assay results, at 24 hours of exposure to Xiaflex®, all DD cell types demonstrated markedly reduced proliferation with minimal dose-dependency. Collagenase A also caused reduced proliferation across all DD cell types, with dose-dependent effects in DD-Nodule but no dose-related effects in the other cell types. In DD-Cord, Collagenase decreased proliferation more than Xiaflex®, whereas the opposite was true in DD-Fat. In CT samples, overall both Xiaflex® and Collagenase caused a reduction in proliferation, however, in CT-Skin and CT-Fat there was a dose-dependent reduction with Xiaflex® whereas in CT-Fascia Xiaflex® caused reduced proliferation at low doses with a less marked effect at higher doses.

Following the post-drug exposure recovery period, both DD and CT samples showed some improvement in proliferation, although not to pre-exposure levels. In all DD cell types there was a dose-independent partial recovery of proliferation after all three drugs. In the CT samples, all showed a return of proliferation but only in CT-Fat this returned to near pre-drug levels (except after Xiaflex® low doses (300–400 ng) where there was a marked lack of proliferative recovery).

#### **Xiaflex® Does not Induce Apoptosis in DD but may Cause Direct Cell Death by Necrosis**

It was hypothesised that Xiaflex® and Collagenase A might achieve their inhibitory effect on cell attachment, spreading and

proliferation via apoptosis or cellular necrosis and therefore this hypothesis was assessed via dual-labelled FACS analysis (using Annexin V and PI labelling). Annexin V detects early apoptosis and propidium iodide (PI) identifies cell death. As is demonstrated in Figure 5, Xiaflex® showed no significant increase in Annexin V-positive cells at 24 hours, whereas higher doses of Collagenase A significantly ( $p < 0.05$ ) increased Annexin V-positive cells in DD fibroblasts from all sites. PI-positive cells (indicating cellular necrosis) were significantly ( $p < 0.05$ ) increased in both enzyme groups in a dose-dependent manner (Figures 5A & 5B). Unlike in DD fibroblasts, both enzymes significantly ( $p < 0.05$ ) increased the Annexin V and PI positive cells in a dose-dependent manner in the CT fibroblast groups (Supplementary Figure S8). From the above results, it can be concluded that Xiaflex® may cause necrosis but not apoptosis in DD primary fibroblasts, while exposure of primary DD fibroblasts to Collagenase A results in both necrosis and apoptosis.

#### **Xiaflex® Downregulates the Expression of Collagen, Fibronectin, $\alpha$ -SMA, TGF- $\beta$ 1 and MMP-9 at the Transcriptional level in a Dose-Dependent manner**

It has been shown previously that DD has been linked with abnormal regulation of many ECM-associated genes, cytokines and growth factors [55–69]. The impact of Xiaflex® and Collagenase A on the expression of some DD-associated fibrotic genes at the mRNA level were therefore evaluated. Relative mRNA quantification of a panel of pro-fibrotic genes in DD fibroblasts from all locations revealed that Xiaflex® ( $p < 0.05$ ) and/or Collagenase A ( $p < 0.01$ ) significantly down-regulated the expression of collagens I and III, fibronectin, alpha smooth muscle actin ( $\alpha$ -SMA), transforming growth factor beta one (TGF- $\beta$ 1) and matrix metalloproteinase type-9 (MMP9) in a dose-dependent manner in DD fibroblasts from one or more sites on day one. A similar trend was also observed in primary fibroblasts isolated from CT samples (Figure 6 and Supplementary Figure S9).

Treatment with both Xiaflex® and Collagenase A resulted in significant ( $p < 0.05$  or  $p < 0.01$ ), dose-dependent down-regulation of both Collagen I and Collagen III as well as  $\alpha$ -SMA in DD fibroblasts isolated from all sites (Figures 6A, 6B and 6D) and from primary CT fibroblasts from all sites (Supplementary Figures S9A, S9B and S9C). The magnitude of the changes was generally greater in cells treated with Xiaflex® compared to cells treated with Collagenase A.

Neither Xiaflex® nor Collagenase A had any effect on the mRNA expression levels of MMP2 in DD fibroblasts from any location (Figure 6F) or from fibroblasts isolated from normal CT (Supplementary Figure S9F). Likewise, neither Xiaflex® nor Collagenase A had any effect on MMP9 expression in fibroblasts isolated from the DD cord. However, significant ( $p < 0.05$  or  $p < 0.01$ ) down-regulation of MMP9 was detected in fibroblasts from DD nodule at the highest doses of Xiaflex® and Collagenase A (700 ng and 1000 ng, respectively), in fibroblasts from DD fat at the higher dose of Collagenase A and both doses of Xiaflex®, and in normal skin at the

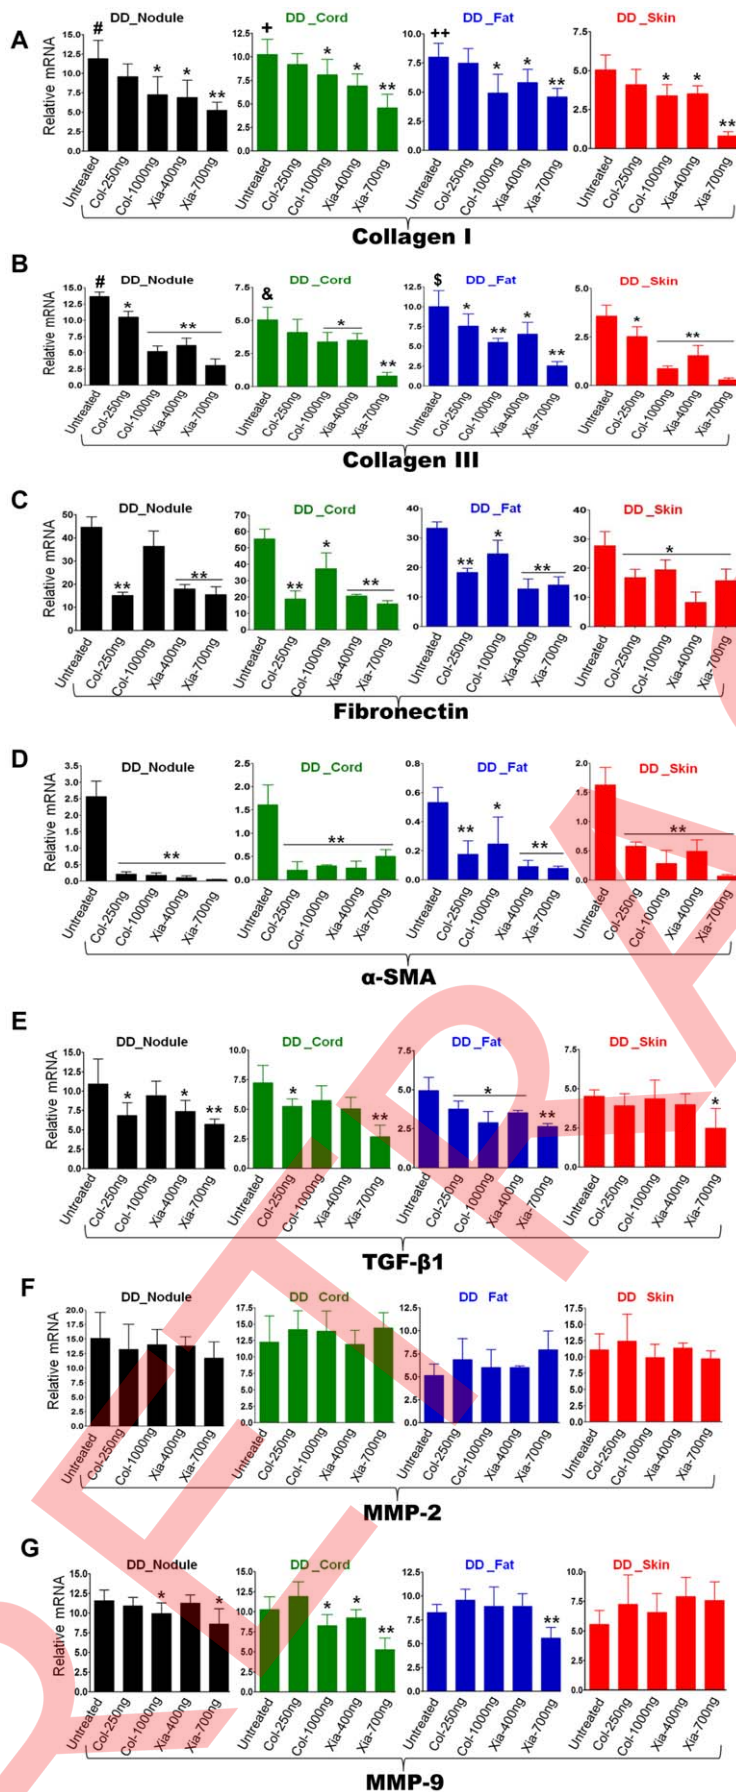



**Figure 6. Measurement of comparative effect of Xiaflex and Collagenase A on mRNA steady-state levels of primary DD fibroblasts isolated from different anatomical sites. A. Collagen I; B. Collagen III.** # $p<0.05$  indicates significant difference in the expression of collagen I & III in the Nodule compared to the Cord, Fat and Skin fibroblasts. + $p<0.05$  indicates significant difference in the expression of collagen I in Cord compared to Fat and Skin fibroblasts. ++ $p<0.05$  indicates significant difference in the expression of collagen I in Fat compared to Skin fibroblasts. & $p<0.05$  indicates significant difference in the expression of collagen III in Cord compared to Skin fibroblasts. \$ $p<0.05$  indicates significant difference in the expression of collagen III in Fat compared to Cord and Skin fibroblasts. **C. Fibronectin; D.  $\alpha$ -SMA; E. TGF- $\beta$  I; F. MMP-2; G. MMP-9.** \* $p<0.05$ , \*\* $p\leq 0.01$  indicates significant difference between mRNA steady state levels of untreated and treated fibroblasts. The data presented here are the averaged results from three independent experiments. doi:10.1371/journal.pone.0031430.g006

higher dose of Xiaflex® (Figure 6G). In contrast, both Xiaflex® and Collagenase A down-regulated MMP9 expression in fibroblasts isolated from normal CT at all sites (Supplementary Figure S9G). Neither Xiaflex® nor Collagenase A had any effect on the expression of NF- $\kappa$ B-p50 or NF- $\kappa$ B-p65 (RelA) in DD fibroblasts from any location (Supplementary Figures S10A and S10B).

The effects of the two enzyme treatments on fibronectin and TGF- $\beta$ 1 were not consistent in fibroblasts across all DD sites (Figures 6C and 6E). Treatment of fibroblasts from all DD sites with Xiaflex® resulted in significant ( $p<0.05$  or  $p<0.01$ ) dose dependent down-regulation of both fibronectin and TGF- $\beta$ 1; in contrast, treatment with Collagenase A resulted in either no down-regulation or down-regulation that was not dose dependent (usually greater at the lower dose level). The exception was in fibroblasts from DD Fat, where Collagenase A treatment resulted in dose dependent down-regulation of TGF- $\beta$ 1. In normal CT, however, both Xiaflex® and Collagenase A resulted in significant ( $p<0.05$  or  $p<0.01$ ), dose dependent down-regulation of both genes (Supplementary Figures S9D and S9E).

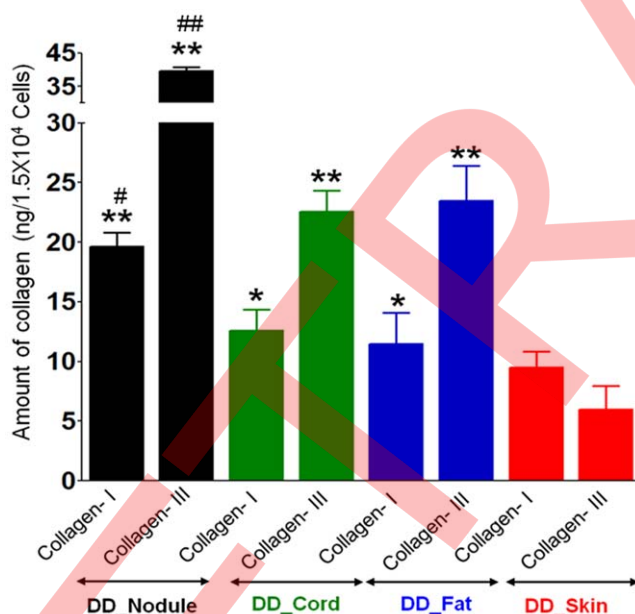

**Figure 7. In vitro quantitative measurement of collagen I and III in DD fibroblasts.** Synthesis of collagen I and III was measured by capture sandwich ELISA (for collagen I expression) and Indirect ELISA (for collagen III expression). \* $p<0.05$ , \*\* $p\leq 0.01$  indicates significant difference compared to the DD-Skin fibroblasts. # $p<0.05$  indicates significant difference in Nodule compared to the Cord, Fat and Skin fibroblasts, in the expression of collagen I. ## $p\leq 0.01$  indicates significant difference in the expression of collagen III in Nodule compared to Cord, Fat and Skin fibroblasts. The data presented here are the means  $\pm$  SEM of three averaged independent experiments carried out in triplicates. doi:10.1371/journal.pone.0031430.g007

### Differential Expression of Collagen I and III and Effects of Xiaflex® or Collagenase A Treatment on Collagen Expression in DD Primary Fibroblasts Isolated from Different Anatomical Sites

Several groups have previously shown that collagen is over-expressed in DD and the ratio of collagen I to III differs [19,57,70], however variation in collagen expression between fibroblasts isolated from different DD anatomical sites has not previously been described. Hence, prior to studying the effect of Xiaflex® and Collagenase A on DD fibroblasts, the expression of collagen I and III in DD fibroblasts isolated from different anatomical sites was determined using capture sandwich and indirect ELISA techniques respectively (Figure 7) [50,51]. Collagen expression patterns were significantly ( $p<0.05$  or  $p<0.01$ ) different in DD fibroblasts from the different anatomical sites when compared to those in DD skin fibroblasts. The highest levels of both collagen I and III were detected in DD fibroblasts isolated from Nodules, while fibroblasts from both DD Cord and Fat had increased expression of both collagens relative to DD Skin fibroblasts, but at lower relative levels than the Nodule fibroblasts. In contrast to fibroblasts from DD Skin (where the level of collagen I was greater than that of collagen III), collagen III levels were higher than collagen I in DD fibroblasts from Nodule, Cord and Fat. The protein expression results are generally consistent with the mRNA expression patterns in fibroblasts from the same sites as detected by qRT-PCR (Figures 6A and 6B).

Consistent with the result of the qRT-PCR analysis, treatment of fibroblasts from all DD sites with either Xiaflex® or Collagenase A resulted in significant ( $p<0.05$  or  $p<0.01$ ), generally dose-dependent reduction in collagen I and III expression (Figures 8 A and B). Overall, the magnitude of reduction was greater in cells treated with Xiaflex® than in those treated with Collagenase A, however no direct dose-to-dose comparison is possible due to the inability to compare the defined activity of each enzyme and thus the inability to normalise doses to enzyme activity.

### Xiaflex® Downregulates the Expression of Collagen, Fibronectin, $\alpha$ -SMA, Desmin, Tenascin and CTGF at the protein level in a Dose-Dependent Manner

DD is known to be associated with a number of molecular abnormalities of cytokine and growth factor over-expression (e.g. transforming growth factor beta (TGF- $\beta$ ), platelet derived growth factor (PDGF) and connective tissue growth factor (CTGF)) [65,68,71,72] and over-expression of a number of ECM-associated proteins (eg Collagen, Fibronectin, Tenascin and  $\alpha$ -SMA). Hence, it was necessary to compare the effect of Xiaflex® and Collagenase A at the molecular level on cytokines, growth factors and on the ECM-associated proteins expressed by DD and CT fibroblasts isolated from the different anatomical sites. For this purpose, we utilised a novel, high throughput On-Cell and In-Cell Western blotting technique [50,52–54]. In-Cell Western blotting results showed that both drugs significantly ( $p<0.05$ ) down-regulated a number of ECM components and growth factor at the protein level, including Collagen I, III and IV, Fibronectin, Tenascin, Desmin,  $\alpha$ -SMA,

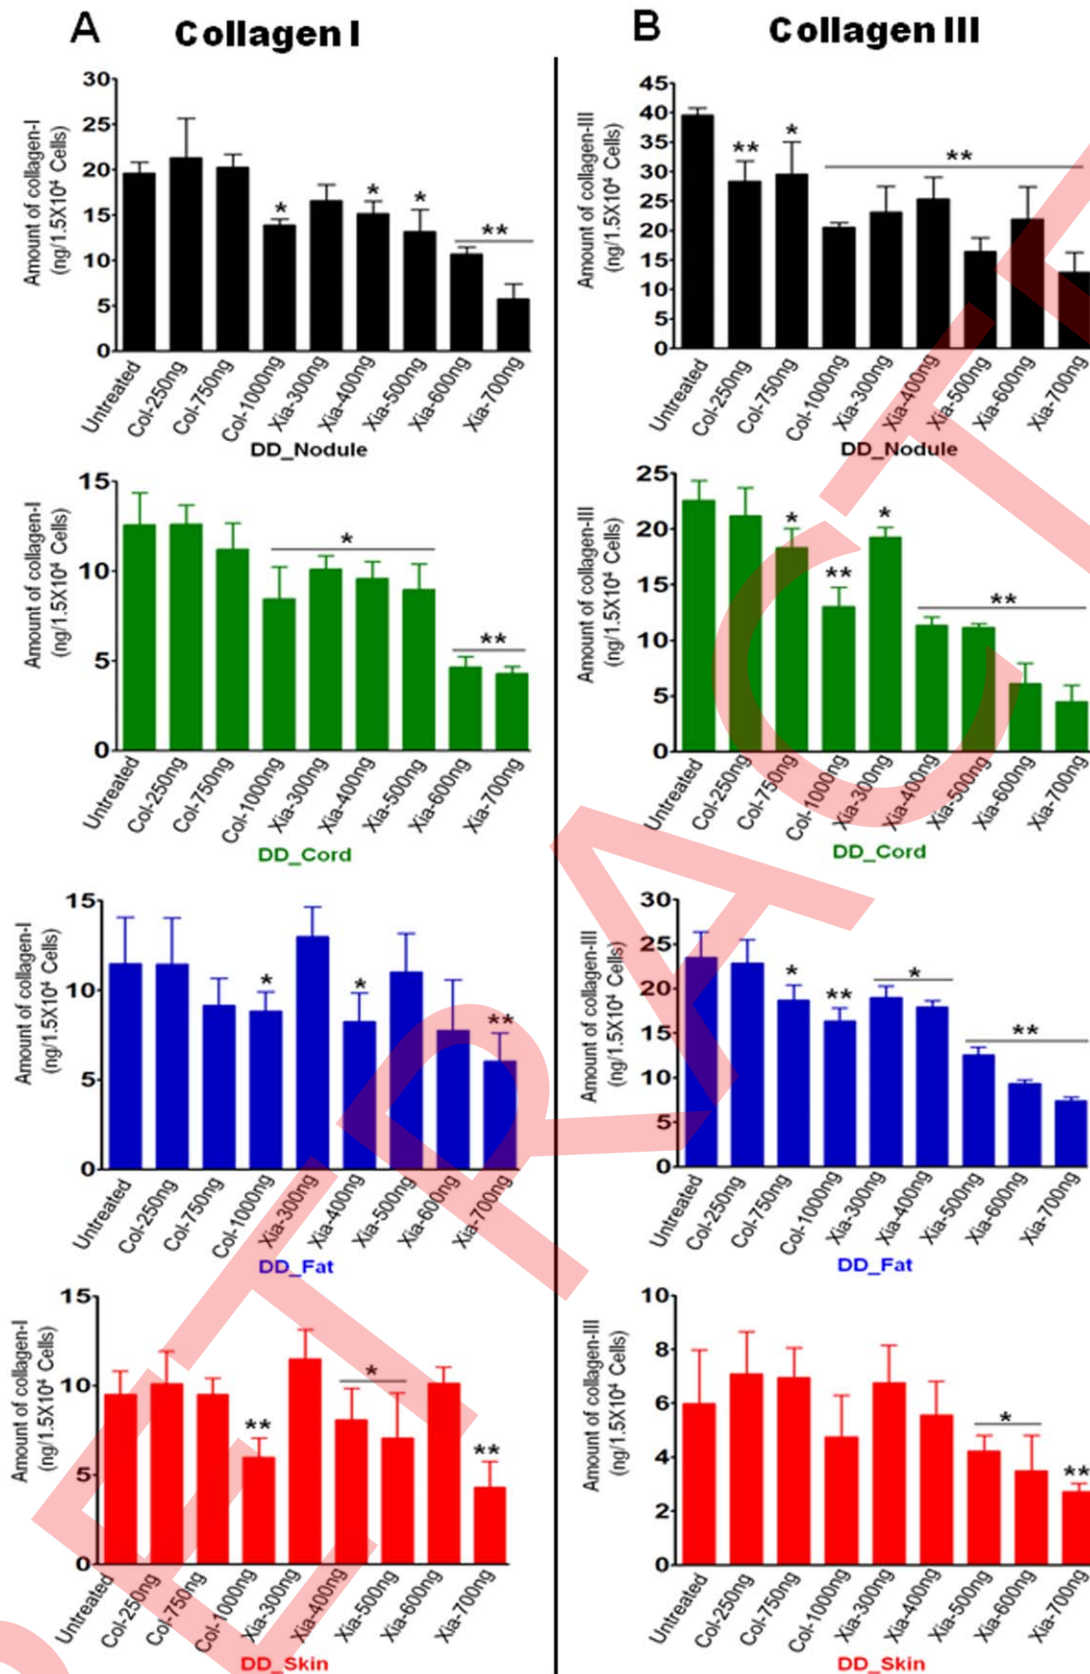

**Figure 8. Comparison of the effect of Xiaflex® and Collagenase A on Type I and Type III collagen protein synthesis by DD fibroblasts.** DD fibroblasts from passages 1–4 were cultured in a 96 well plate ( $1.5 \times 10^4$  cells/well) and treated with both drugs at various concentrations as indicated in the figure. Cell lysates from treated and untreated cells were subjected to capture sandwich ELISA (for the detection of collagen I) and Indirect ELISA (for the detection of collagen III) as described previously. **A.** Collagen I and **B.** Collagen III. \* $p < 0.05$ , \*\* $p \leq 0.01$ , indicate significant difference in treated group compared to untreated control group. The data presented here are the average of three independent experiments performed in triplicates. doi:10.1371/journal.pone.0031430.g008



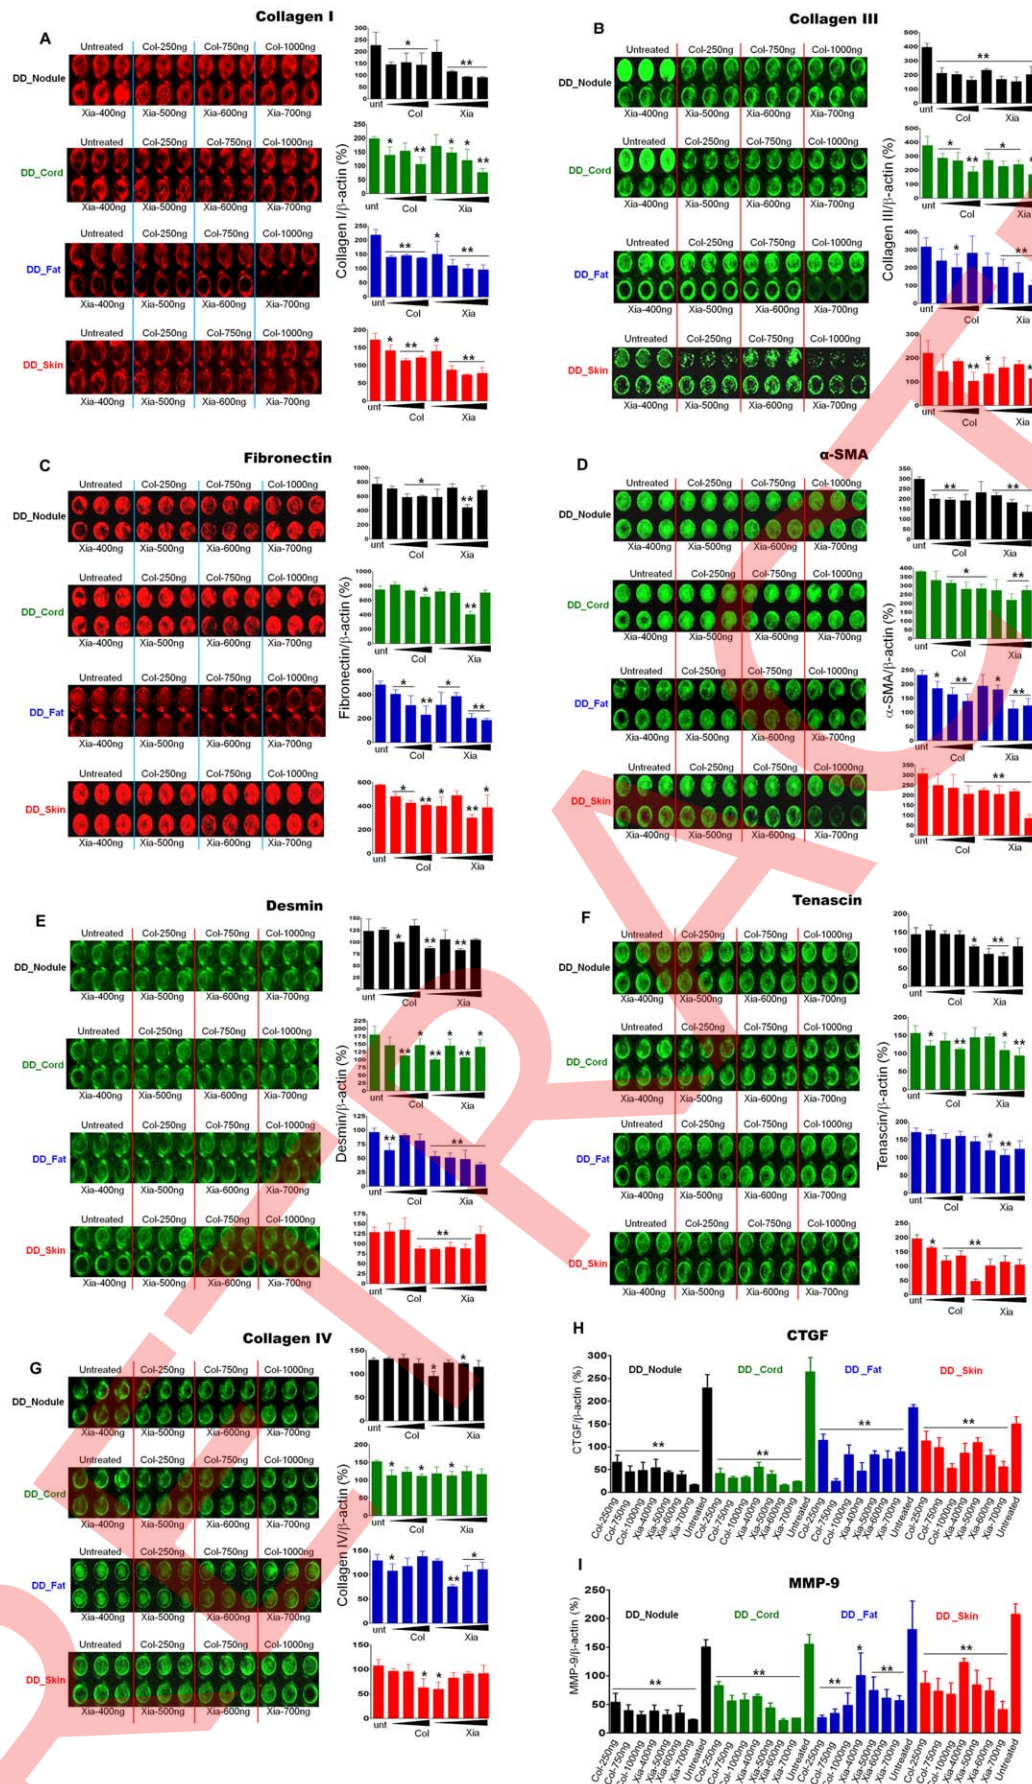



**Figure 9. Quantitative In-Cell Western blotting assay for the analysis of protein expression upon treatment with Xiaflex® and Collagenase A by DD fibroblasts.** Primary fibroblasts were seeded in 96 well plate ( $1.5 \times 10^4$  cells/well) and allowed to grow for ~7–8 hours. The cells were then treated with various concentrations of Xiaflex® and Collagenase A as indicated. At 24 hours drug treatment, the cells were fixed in 4% formaldehyde/PBS. In-Cell Western blotting was performed. Representative output infrared images of treated and untreated fibroblasts, stained for protein expression (visible in green/red) from different anatomical sites are shown. Bar graphs represent the quantification of average protein expression in different treatments from three independent experiments after normalization to loading control beta-actin. **A.** Collagen I; **B.** Collagen III; **C.** Fibronectin; **D.**  $\alpha$ -SMA; **E.** Desmin; **F.** Tenascin; **G.** Collagen IV; **H.** CTGF; **I.** MMP-9. \* $p < 0.05$ , \*\* $p \leq 0.01$ , indicate significant difference in treated group compared to untreated control group. The data presented here are the means  $\pm$  SEM of triplicate experiments. unt: untreated. doi:10.1371/journal.pone.0031430.g009

CTGF and MMP-9 at 24 hrs post-treatment, with this effect found to be dose-dependent. However, as expected, the Xiaflex® down-regulatory effect on DD fibroblasts (pan-site) was evident at very low concentrations compared to Collagenase A (Figures 9A–I). Surprisingly, the effect of both drugs was significantly greater on the CT fibroblast ECM proteins and cytokines (Supplementary Figures S11) when compared with the noted effect on DD fibroblasts.

### Xiaflex® Induces Cell Cycle Marker Down-regulation and Decreases Fibroblast proliferation

The results of the RTCA and WST-1 analyses indicated reduced levels of cell attachment, spreading and proliferation and reduced cell viability/metabolic activity in treated DD (Figures 3 and 4) and CT (Supplementary Figures S6 and S7) fibroblasts. To further investigate these findings, the expression of the cell cycle proteins proliferating cell nuclear antigen (PCNA) and Cyclins D1 and 2 was evaluated by qRT-PCR and In-Cell Western blotting to assess the effects of Xiaflex® and Collagenase A treatment on the cell cycle. Significant ( $p < 0.05$  or  $p < 0.01$ ), dose-dependent down-regulation of PCNA, Cyclin D1 and Cyclin D2 was detected in fibroblasts treated with either Xiaflex® or Collagenase A from all DD sites at mRNA (Figure 10A) and protein level (Figure 10B) when compared against the untreated control group of (pan-site) DD and CT fibroblasts. However, as expected Xiaflex® was able to achieve this down-regulation at very low concentrations compared to Collagenase A in both DD and CT (Supplementary Figures S12).

### Xiaflex® Promotes DD Fibroblast Cellular Responses to Injury and Wound Healing *in vitro* at Low Concentrations, but Inhibits such Responses at Higher Concentrations

Several recent publications have reported that CCH enhances the migration of keratinocytes and fibroblasts both *in vitro* and promotes wound healing *in vivo* [73–75]. These effects have been shown not to be directly attributable to the enzyme itself but instead are mediated by the *in situ* generation of collagen fragments from the ECM and/or disruption of  $\alpha_2\beta_1$  integrin interactions with the ECM [73–75]. In view of this, an *in vitro* wound model was utilised to look at the response to injury via cell mobility - achievement of closure of an artificially-created scratch wound was compared pre- and post-exposure to Xiaflex® and Collagenase A. The wound model involved a fully (100%) confluent cell monolayer across which a narrow scratch wound was created using a pipette tip. In the presence of low concentrations of Xiaflex® (300–400 ng) or Collagenase A (250 ng), fibroblasts from all DD sites migrated into the wound at a significantly ( $p < 0.05$ ) faster rate compared with the site-matched untreated control group. However, at the higher concentrations of either Xiaflex® ( $\geq 500$  ng) or Collagenase A ( $\geq 750$  ng), the DD fibroblast migratory response to injury was significantly ( $p \leq 0.01$ ) inhibited (Figures 11A and B).

## Discussion

Dupuytren's disease (DD) is a benign yet common fibroproliferative disorder of the palmar fascia and represents an ideal

model to study tissue fibrosis. In addition, DD is a progressive, irreversible and recurrent disabling disorder that significantly impacts patients' quality of life. Therefore, advancing knowledge in how to effectively treat this clinically challenging disorder is of paramount importance. The underlying cellular events involving the abnormal synthesis of a number of ECM components (such as collagen type I and III,  $\alpha$ -smooth muscle actins, tenascin and fibronectin) are important to our understanding of the complex pathologic processes that result in the pathognomonic digital cord-like contractures that significantly impair hand function.

CCHs are derived from Clostridium bacterial fermentation and act to sequentially cleave collagen triple-helical molecules via hydrolytic attack at the peptide bond of the tri-peptide subunit [28–30], thus effecting enzymatic collagenolysis and cord rupture when injected into DD fascial cords [31–35,44,76,77]. Collagenase A is a comparatively basic CCH preparation designed for laboratory-based tissue dissociation to liberate single cells for cellular culture techniques. It comprises of clostridiopeptidase A, which uniquely degrades the collagen triple-helical fibrils, coupled with clostripain and a variety of other proteases, which effect efficient degradation of the non-collagenous components of tissue ECM. Although a variety of such collagenases have been commercially available for decades, it was not until the advent of the novel CCH, Xiaflex®, which has a reproducible therapeutic *in vivo* effect based on its fixed ratio of synergistic class I and II collagenases, that CCHs were clinically utilised in the treatment of DD. Recent Xiaflex® trials have demonstrated correction of DD fixed-flexion deformities to near-full digital extension (within  $\leq 5^\circ$  of extension) following single- or multi-dose CCH cord injections, with efficacy and safety profiles that appear comparable in short- to mid-term follow-up to those of the favoured surgical treatments [31–35].

This is the first published *in vitro* study demonstrating the effects of Xiaflex® on DD and CT primary fibroblasts obtained from different anatomical sites. It is also the first study to compare such effects against the long-standing commercially available Collagenase A. In this study, we used a variety of techniques (including label-free RTCA, LDH, WST-1, FACS, qRT-PCR, ELISA, In-cell Western Blotting and an *in vitro* scratch wound healing model) and were able to assess the effects of Xiaflex® compared to Collagenase A on cultured DD and CT fibroblasts.

RTCA has not previously been utilised to assess DD fibroblast growth - its great benefit is to dispense with complex labeling procedures that may affect cellular behaviour and its ability to monitor cell attachment, spreading and proliferation in real-time. Thus, RTCA is able to assess the effect over time of applied drugs and cellular recovery following drug removal. This mimics the physiological behaviour of the cells more closely, giving greater insight into possible *in vivo* responses. RTCA pilots demonstrated that 10% FBS (added as a cell nutrient to the media) inhibited both drugs' action (at all concentrations); in view of this, the methodology was modified, with use of FBS-free supWille media for all later experiments. The pilot demonstrated that Xiaflex® exerts a greater effect in supWille than in supDMEM when comparing fibroblast spreading, attachment and proliferation via RTCA. This discrepancy is likely due to the presence of calcium and zinc in Wille as

**A**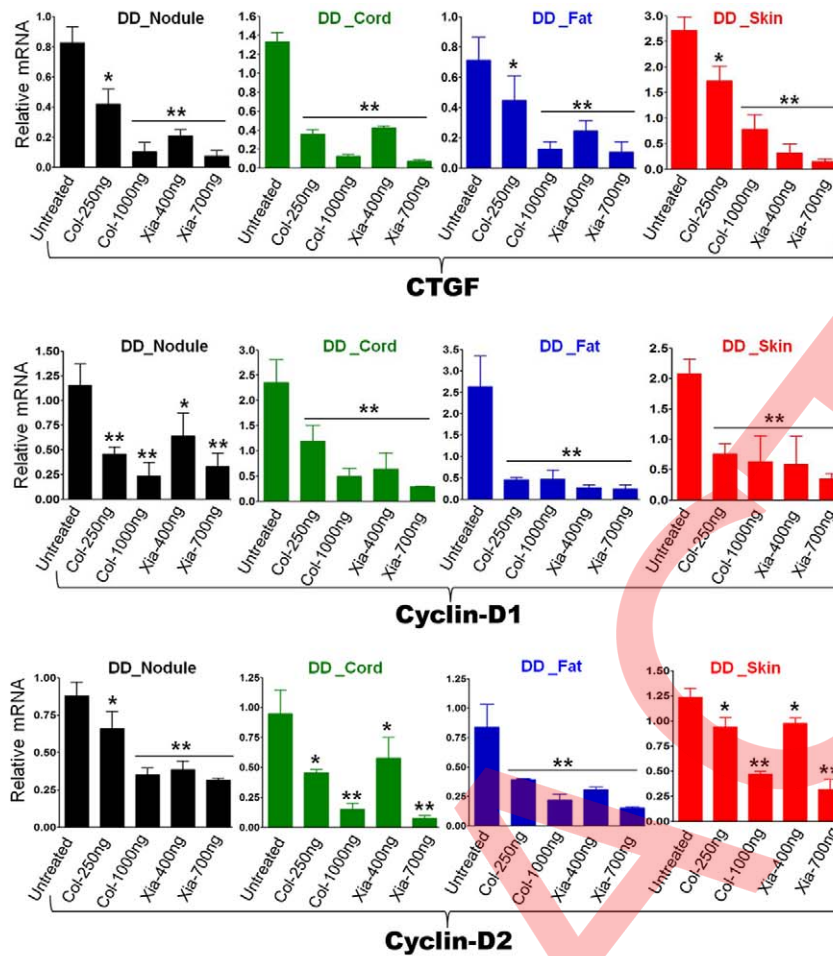**B**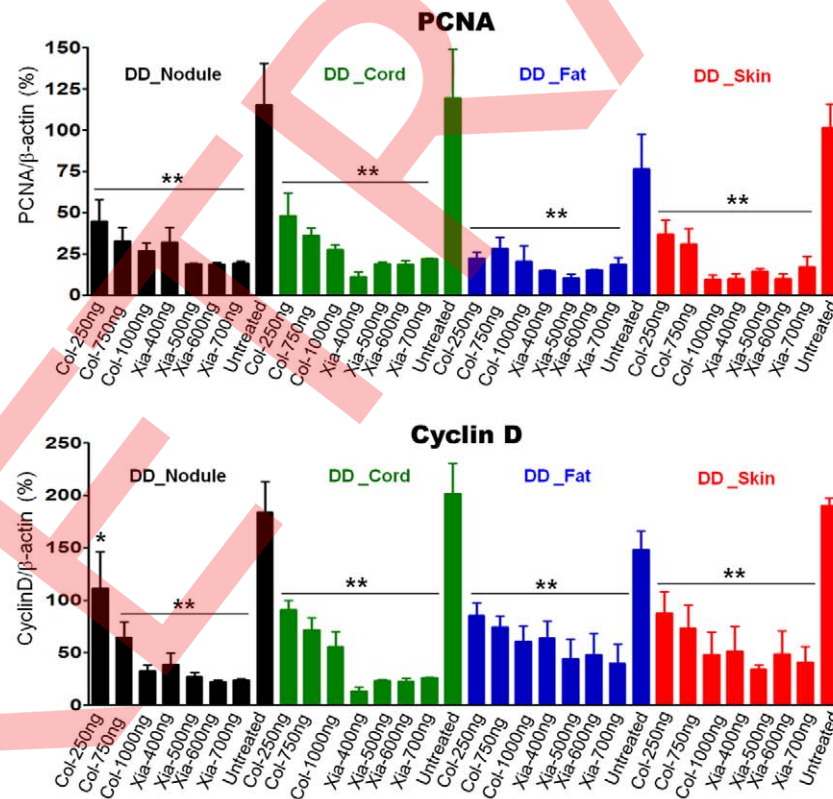

**Figure 10. Comparison of the effect of Xiaflex® and Collagenase A on cell cycle regulation.** Cell cycle gene (PCNA, Cyclin D1 and Cyclin D2) were assessed at mRNA and protein levels using qRT-PCR and In-Cell Western blotting respectively. **A.** mRNA steady-state levels of cell cycle genes (PCNA, Cyclin D1 and Cyclin D2) after treatment with Xiaflex® and Collagenase A at various concentrations as indicated in the graphs. All the cell cycle genes were dose-dependently down regulated by Xiaflex® and Collagenase A compared to the untreated control group. **B.** Relative protein expression of cell cycle proteins (PCNA and Cyclin D) after treatment with Xiaflex® and Collagenase A. \* $p < 0.05$ , \*\* $p \leq 0.01$ , indicate significant difference in treated group compared to untreated control group. The data presented here are the average of three independent experiments performed in triplicate. Results are presented as means  $\pm$  SEM of triplicates. doi:10.1371/journal.pone.0031430.g010

Xiaflex® requires both calcium and zinc, which act as metal cofactors to facilitate the enzymatic process [78] whereas DMEM contains only calcium. It has been shown that calcium is essential to maintain the appropriate structure of the collagen-binding site to accept the triple-helical structure of the collagen fibrils but that Zinc is required for overall activation of the catalytic site [78]. Obviously, this is not an issue in *in vivo* Xiaflex® application due to the supplied buffer solution along with the local endogenous tissue presence of the necessary metal cofactors.

Following the pilots, RTCA assessing the effect of untreated and drug-treated DD fibroblast behaviour noted heterogeneity in the untreated cellular behaviour depending on the anatomical derivation of the cells – fibroblasts isolated from Nodule and Cord were able to grow faster and produce higher cell numbers than those from Fat and Skin. This is not surprising when one reflects on the pathological progression of this fibroproliferative disorder that previously was thought to act as a benign tumour. Both Collagenase A and Xiaflex® effected inhibition of DD cell spreading, attachment and proliferation in a dose- and time-dependent manner. This effect was minimal at lower concentrations (50–100 ng doses), increasing significantly with medium and high concentrations, and was fully reversed (although without a return to the maximal cell indexes of pre-drug exposure) within 24 hours of removal of either drug. This could be of importance in understanding the mechanisms of disease recurrence despite adequate initial collagenolysis.

To corroborate RTCA results and to compare the effect of both drugs, we performed an end point membrane leakage (cytotoxicity by LDH) assay and a cell viability/metabolic activity (WST-1) assay. LDH showed similar results when compared with those from RTCA - LDH is a stable cytoplasmic enzyme stored in viable cells, with any increase in its leakage indicating that the stability of cell membranes is damaged. WST-1 showed both drugs inhibit pan-site DD and CT cell viability/metabolic activity, with a reversal of the inhibitory effect within 24 hours after removal of the drugs. These results are in agreement with those of the previously discussed RTCA. To get a comprehensive understanding of the inhibitory effect of the drugs on cell proliferation, FACS was used to detect early versus late apoptosis and necrosis after 24 hours of drug treatment. Unlike Collagenase A, Xiaflex® does not cause apoptosis, but instead demonstrated dose-dependent pan-site DD direct cell death via necrosis. In CT fibroblasts, both drugs showed early dose-dependent apoptosis. Collagenase has been shown to cause apoptosis in chondrocytes [79], and it has also been reported that necrosis has been observed in *in vitro* models following treatment with various Collagenases [80]. This study supports these previous findings and could suggest a mechanism for disease recurrence post-Xiaflex® treatment due to the persistence of viable DD cells.

DD tissue has previously been noted to show up-regulation in some ECM proteins, including cytokine and growth factors [3,19,56,64,66,81] and with a notable alteration in the ratio of collagens I to III. These results corroborate previously documented over-expression of collagen in DD, plus demonstrate, for the first time, heterogeneity in collagen type I and type III expression patterns in primary fibroblasts isolated from different DD anatomical sites. Nodule fibroblasts showed significantly higher expression of collagen I and III at mRNA and protein levels as

compared to fibroblasts isolated from DD Cord, Fat and Skin. This is in keeping with previous studies which describe the nodules as being formed within the proliferative, most active pathological phase within a disease noted for its over-expression of Collagen III (compared to Collagen I) [2,82]. Xiaflex® showed a dose-dependent reduction in ECM transcription at the mRNA level in both DD and CT pan-site fibroblasts, but with no significant effect on MMP-9 and nuclear transcription factor NF- $\kappa$ B. Unlike Xiaflex®, Collagenase A treatment resulted in down-regulation of all ECM proteins in both DD and CT at the mRNA level. Comparatively, Xiaflex® and Collagenase A had a similar effect on the tested ECM components and growth factors at an mRNA transcriptional level in both DD and CT samples. Both drugs are composed of collagenolytic enzymes and are primarily differentiated by their ratio of constituent enzymes rather than having grossly different components, so these results are unsurprising. However, it must be noted there is a potential confounding factor in the use of this method to assess collagens (which we intend to explore further in a future study). The method assesses cell lysates and hence both the intracellular collagen liberated on cell membrane disruption, plus any collagen secreted by the cells prior to application of the tested enzymes. This may mean that any enzyme-induced cellular death (or apoptosis) resulting in cell loss could alter overall collagen release due to cell lysis and that enzyme application could act on both cell lysate-released collagen and previously secreted collagen, thus complicating interpretation of the results.

To better understand the inhibitory effect exerted at the molecular level by the drugs, cell-cycle regulated genes, PCNA, Cyclin D1 and Cyclin D2 were analysed for mRNA and protein expression. Both Xiaflex® and Collagenase A down-regulated these cell-cycle genes in a dose-dependent manner in both DD and CT pan-site fibroblasts, with Collagenase A requiring much higher concentrations to exert the same effect.

It has been shown previously that collagenase increases keratinocyte and fibroblast cell migration and promotes both *in vitro* and *in vivo* cellular responses at the wound area [73–75]. This study demonstrates the effect of Xiaflex® and Collagenase A on the migration properties of DD and CT primary fibroblasts isolated from different anatomical sites. Low concentrations of both drugs were found to promote the cellular migration response to repair a mechanically created wound, whereas, at higher concentrations of the drugs this response was inhibited. This supports the previously documented evidence that collagenases can promote the cellular reparatory responses of injured skin – examination of our data suggests that low amounts of collagenolysis may cause liberation of the cells from the ECM allowing chemotactically drug-triggered migration into the damaged areas, coupled with degradation of local collagen into smaller peptides that may up-regulate cellular functions key to wound repair. This is in comparison to the effect of higher concentrations at which the collagenases appear to induce cellular necrosis by Xiaflex® or apoptosis by Collagenase A. This would infer that careful dosage and administration of Xiaflex® is very important: insufficient concentrations or lack of infiltration of all diseased tissues might increase the risk of recurrence. These findings are concerning when one reflects there will always be lower concentrations around



**A**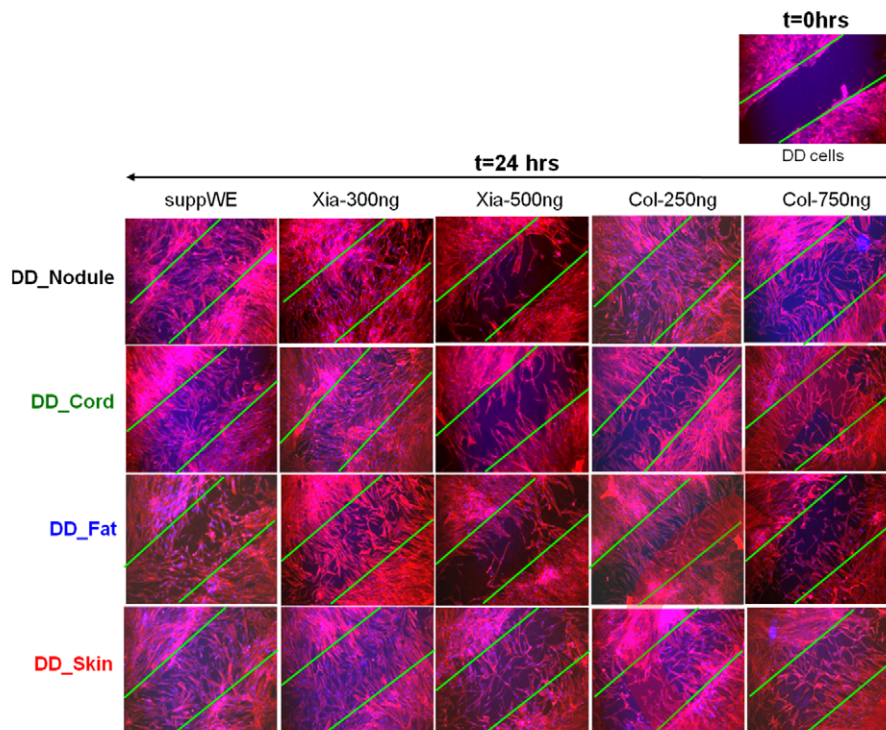**B**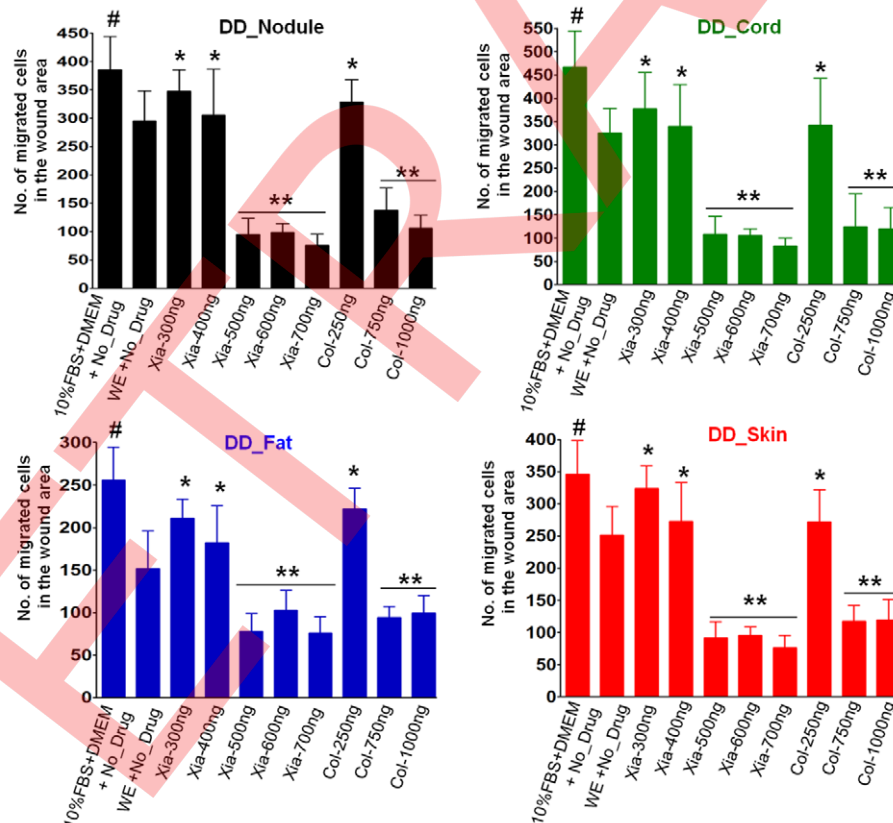

**Figure 11. Effect of Xiaflex® on DD fibroblast migration towards a mechanically created *in vitro* scratch wound. A.** Fibroblast migration response towards injury with and without drugs. Representative micrographs are shown from three independent experiments. **B.** Number of migrated fibroblasts towards wound with and without drugs. Migrated cells into the wound area were counted based on the 0 hour migration

pattern from four micrographs for each treatment. Average of number of migrated cells, from three independent experiments carried out in triplicate were plotted on the graph. \* $p < 0.05$ , \*\* $p \leq 0.01$ , indicate significant difference in the treated group compared to untreated control (WE+no\_Drug) group. # $p < 0.05$  indicates significant difference compared to all the groups. doi:10.1371/journal.pone.0031430.g011

the margins of any injection site. However, our findings are based on monocultured DD cell populations that are likely to act differently from *in vivo* DD cells - to conclusively suggest increased recurrence risk after exposure to lower doses of Xiaflex® (and hence the margins of all injection sites), further *in vitro* and *ex vivo* organ culture model studies are required.

Throughout the experiments, Xiaflex® was noted to achieve a similar inhibitory effect on pan-site DD fibroblasts at significantly lower concentrations when compared to Collagenase A, supporting the manufacturer's theory of greater potency due to the synergistic effect of the contained set-ratio class I and II collagenases (AUX-I and AUX-II). In addition, compared with other commercially-available collagenase formulations, Xiaflex® does not contain those previously recognised impurities noted in other collagenase preparations e.g. clostridial peptides, nonspecific proteases (e.g. caseinase) and other bacterial production impurities that may impact cellular migration, attachment and proliferation [24,36]. Interestingly, both drugs showed a similar effect on the control CT fibroblasts - we are currently unclear as to the precise mechanism of why Xiaflex® potency was not similar to that seen in DD cells. One explanation for this discrepancy could be the reduced amount of collagen found in the CT (i.e. normal fascia) samples which decreases the substrate availability on which Xiaflex® and Collagenase A can act.

DD cellular recovery following removal of both drugs was noted in cells from all anatomical sites except DD fat. The precise mechanism of this finding remains unclear and will require further future investigation. However, the local cellular recovery (in all but DD fat cells) does support the *in vivo* finding of the non-curative nature of CCH-injection - the disease has been seen to recur following Xiaflex® injection [31].

This experimental study has demonstrated the effects at a cellular and molecular level of the effects exerted by Xiaflex® and Collagenase A on DD and CT primary fibroblasts isolated from different anatomical sites. These effects were primarily reversible on removal of the drugs after 24 hours exposure, although this cannot be directly compared with drug metabolism that occurs *in vivo*. The observed cellular recovery post-drug removal may also be due to the presence of myofibroblasts [56,60,62] and stem-like cells [45] associated with DD that may lead to the recurrence of DD.

In conclusion, this is the first study to elucidate and compare the mechanism of action of Xiaflex® and Collagenase A at a cellular and molecular level on DD and CT primary fibroblasts isolated from different anatomical sites. Application of Xiaflex® inhibits cellular spreading, attachment and proliferation in a dose-dependent and time-dependent manner at the cellular level and also shows dose-dependent inhibition at the transcriptional level for many ECM components, cytokine and growth factors.

## Supporting Information

**Figure S1 Schematic of Real-Time Cell Analyser (RTCA) with Microelectronic Sensory Array (MESA).** (1) Loading cells ( $1.5 \times 10^4$  cells/well) in supDMEM media. (2) Allowing cell attachment and growth for 7–8 hours. (3) Adding the drugs at various concentrations. (4) Monitoring the effect of drugs on cell spreading, attachment and cell growth up to 24 hours. (5) Retrieval of the drugs after 24 hours exposure. (6) Monitoring the reversibility of inhibitory effect of drugs and cells were allowed to grow for further 24 hours. (a) the cell index is 0 before loading the cells; (b) the presence of cells affect the local ionic environment at the

electrode/solution interface, leading to increase in the electrode impedance and cell index (CI); (c) when control cells (blue line) continually proliferate and more cells attach to the electrodes, leading to the large increase in electrode impedance, hence more increase in CI; (d) when cells die off, shrink or decrease their surface attachment (both intercellular and to the underlying electrode surface) resulting from the exposure to a drug electrode impedance decreases, hence CI decreases; (e) when the drug is retrieved, cells will start spreading and growth will increase, hence electrode impedance increases, leading to increase in CI. (TIF)

**Figure S2 Effect of Xiaflex® and Collagenase A in the presence of serum.** **A.** Effect of Xiaflex® and Collagenase A on Dupuytren's disease (DD)-Nodule fibroblasts. **B.** Effect of Xiaflex® and Collagenase A on DD-Cord fibroblasts. (TIF)

**Figure S3 Comparison of Effect of Xiaflex® in DMEM and WE supplemented media on Dupuytren's disease (DD) Nodule fibroblasts by Real-Time Cell Analyser (RTCA).** DD-Nodule fibroblasts were seeded on 96-well E-plate to a density of  $1.5 \times 10^4$  cells/well and allowed to attach and grow for 16–18 hours, following which Xiaflex® diluted in supDMEM and supWE was added at various concentrations as indicated in graph. The cells were further monitored for 24 hours to assess and compare the effect of Xiaflex® in both media. The drug solutions were removed after 24 hours and cells allowed to grow in drug-free supDMEM and supWille for a further 24 hours to assess the reversibility of drug inhibition effect on cells. (TIF)

**Figure S4 Real-Time Cell Analyser (RTCA) Monitoring of Xiaflex® and Collagenase A effect on Dupuytren's disease (DD) primary fibroblasts from different anatomical sites.** **A.** Effect of Xiaflex® and Collagenase A on DD-Fat. **B.** Effect of Xiaflex® and Collagenase A on DD-Skin. (TIF)

**Figure S5 Real-Time Cell Analyser (RTCA) Monitoring of Xiaflex and Collagenase A effect on Carpal Tunnel (CT) primary fibroblasts from different anatomical sites.** Primary fibroblasts isolated from different anatomical sites of CT (Fascia, Fat and Skin) were seeded onto 96-well E-plates ( $1.5 \times 10^4$  cells/well) and cells grown for ~7–8 hours, prior to the addition of Xiaflex® or Collagenase A at various concentrations as described in the methods section. After drug addition, cells were allowed to grow for 24 hours in the presence of drugs. After 24 hours, the drugs were retrieved and the cells were fed with fresh drug-free supWille media, to assess the reversibility of the inhibitory effect of both drugs over the following 24 hrs. Cell Indexes were recorded every 15 mins. Each trace at each concentration was an average of three replicates. **A.** Effect of Xiaflex® and Collagenase A on CT-Skin primary fibroblasts. **B.** Effect of Xiaflex® and Collagenase A on CT-Fat primary fibroblasts. **C.** Effect of Xiaflex® and Collagenase A on CT-Fascia primary fibroblasts. Representative data from six independent experiments in triplicates are shown. (PPTX)

**Figure S6 Real-Time Cell Analyser (RTCA) averaged data of Xiaflex® and Collagenase A effects on Carpal Tunnel (CT) primary fibroblasts obtained from differ-**

**ent anatomical sites.** Averaged cell indexes (CI) of untreated and treated groups from indicated time scale were taken from six RTCA independent experiments and plotted on the graph. (TIF)

**Figure S7 Cell viability/metabolic activity measured by WST-1 (water soluble-tetrazolium salt-1) assay after drug treatment.** CT-primary fibroblasts from different anatomical sites (Fascia, Fat and Skin) were seeded in a 96-well plate at a density of  $1.5 \times 10^4$  cells/well. Cells were allowed to attach and grow for ~7–8 hours prior to Xiaflex and Collagenase A addition at various concentrations as indicated in the methods section. The cells were grown for 24 hours in the presence of drugs. Following 24 hours, the drugs were removed and cells were supplemented with drug-free supWILL media and reversibility of cell death and cell proliferation was further assessed for 24 hours. WST-1 assay for viability/metabolic activity. \* $p < 0.05$ , indicates significant difference compared to untreated group. The data are expressed as a mean  $\pm$  SEM from three independent experiments. (TIF)

**Figure S8 Analysis of Annexin V and PI positive cells after drug treatment.** CT-primary fibroblasts were treated with various concentration of Xiaflex® and Collagenase A as indicated in the graphs and subjected to Annexin V and PI labeling. FITC-conjugated annexin V staining for untreated cells, upper left plot (labeled-untreated), compared with the viable control cells, upper right plot (unlabeled cells). Dual-staining of treated cells (lower panel): the quadrant analysis shows: viable cells negative for annexin V and excluding PI in lower left, R3; Apoptotic cells stained with annexin V but excluding PI in lower right, R4; Secondary necrotic cells (i.e. necrosis post-apoptosis), positive for both PI and annexin V, shown in upper right, R2; and, Necrotic or mechanically damaged cells positive for PI only shown in the upper left, R1. Representative data are shown from three independent experiments in triplicate. (TIF)

**Figure S9 Effect of Xiaflex and Collagenase A on mRNA steady-state levels of primary CT fibroblasts.** 24 hours post-drug exposure at various concentrations as described in the methods section, RNA was prepared and cDNA was synthesised from 500 ng of RNA, following which qPCR was performed as described previously. The effect of Xiaflex® and Collagenase A on mRNA transcription of: **A.** Collagen I; **B.** Collagen III; **C.**  $\alpha$ -SMA; **D.** Fibronectin; **E.** TGF- $\beta$  I; **F.** MMP-2 and **G.** MMP-9. \* $p < 0.05$ ; \*\* $p \leq 0.01$  indicates significant difference between mRNA expression of untreated and treated fibroblasts. The data presented here are the average results from three independent experiments. (PPTX)

**Figure S10 Comparative effect of Xiaflex and Collagenase A on mRNA steady-state levels of primary Dupuytren's disease (DD) fibroblasts isolated from different anatomical sites.** **A.** NF- $\kappa$ B-p50; **B.** NF- $\kappa$ B-Rela-p65. The data presented here are the averaged results from three independent experiments. (TIF)

## References

- Bayat A, McGrouther DA (2006) Management of Dupuytren's disease - Clear advice for an elusive condition. *Annals of the Royal College of Surgeons of England* 88: 3–8.
- Thurston AJ (2003) Dupuytren's disease. *Journal of Bone and Joint Surgery - Series B* 85: 469–477.
- Caufield RJ, Edwards SG (2008) Dupuytren disease: An update on recent literature. *Current Orthopaedic Practice* 19: 499–502.
- Dupuytren G (1834) Permanent retraction of the fingers, produced by an affection of the palmar fascia. *Lancet* 2: 222–225.
- Shih B, Bayat A (2010) Scientific understanding and clinical management of Dupuytren disease. *Nat Rev Rheumatol* 6: 715–726.
- Hindocha S, John S, Stanley JK, Watson SJ, Bayat A (2006) The heritability of Dupuytren's disease: Familial aggregation and its clinical significance. *Journal of Hand Surgery* 31: 204–210.

**Figure S11 In-Cell Western blotting assay for the analysis of protein expression.** CT-primary fibroblasts were seeded in 96-well plates ( $1.5 \times 10^4$  cells/well) and grown for ~7–8 hours. Following which various concentrations of Xiaflex® and Collagenase A were added as described in the methods section. 24 hours post-drug treatment; the cells were fixed in 4% formaldehyde/PBS. In-Cell Western blotting was performed as described in the methods section. Representative output infrared images of treated and untreated fibroblasts, stained for protein expression (visible in green/red) are shown. Bar graphs represent the quantification of average protein expression in different treatments from three independent experiments. \* $p < 0.05$ ; \*\* $p \leq 0.01$  indicates significant difference in the treated group compared to the untreated control group. The data presented here are the means  $\pm$  SEM of triplicates. **A.** Collagen I; **B.** Collagen III; **C.** Fibronectin; **D.**  $\alpha$ -SMA; **E.** Collagen IV; **F.** Desmin; **G.** Tenascin. (PPTX)

**Figure S12 Effect of Xiaflex® and Collagenase A on cell cycle regulation.** Cell cycle genes (PCNA and Cyclin D1) were assessed at mRNA and protein levels using qRT-PCR and In-Cell Western blotting respectively as described in the methods section. **A.** mRNA steady-state levels of PCNA. **B.** mRNA steady-state levels of Cyclin D1, after 24 hours treatment. Both cell cycle genes were dose-dependently down regulated by Xiaflex® and Collagenase A compared to the untreated control group. **C.** Relative protein expression of PCNA and, **D.** Relative protein expression of Cyclin D, after 24 hours treatment. \* $p < 0.05$ ; \*\* $p \leq 0.01$  indicates significant difference in the treated group compared to the untreated control group. The data presented here are the average of three independent experiments performed in triplicate. Results are presented as means  $\pm$  SEM of triplicates. (PPTX)

**Table S1** List of primers used for qRT-PCR. (DOCX)

**Table S2** List of primary antibodies utilised. (DOCX)

**Table S3** List of secondary antibodies utilised. (DOCX)

## Acknowledgments

Our gratitude goes to the study participants and nursing staff of University Hospital South Manchester NHS Foundation Trust and Salford Royal NHS Foundation Trust. We wish to thank Auxilium Pharmaceuticals who provided the Xiaflex® free of charge for the purpose of this study. Our sincere gratitude also goes to the clinicians who provided the tissue samples for this study, without which this work could not have been undertaken.

## Author Contributions

Conceived and designed the experiments: FS AT AB. Performed the experiments: FS AT SS VK. Analyzed the data: FS AT AB. Contributed reagents/materials/analysis tools: SEH. Wrote the paper: FS AT SEH AB.



7. Bayat A, Watson JS, Stanley JK, Alansari A, Shah M, et al. (2002) Genetic susceptibility in Dupuytren's disease. *Journal of Bone and Joint Surgery - Series B* 84: 211–215.
8. An HS, Southworth SR, Jackson WT, Russ B (1988) Cigarette smoking and Dupuytren's contracture of the hand. *Journal of Hand Surgery* 13: 872–874.
9. Gudmundsson KG, Arngrimsson R, Sigfusson N, Björnsson A, Jónsson T (2000) Epidemiology of Dupuytren's disease: Clinical, serological, and social assessment. The Reykjavik Study. *Journal of Clinical Epidemiology* 53: 291–296.
10. Arkkila PET, Kantola IM, Viikari JSA (1997) Dupuytren's disease: Association with chronic diabetic complications. *Journal of Rheumatology* 24: 153–159.
11. Attali P, Ink O, Pelletier G, Vernier C, Jean F, et al. (1987) Dupuytren's contracture, alcohol consumption, and chronic liver disease. *Archives of Internal Medicine* 147: 1065–1067.
12. Sanderson PL, Morris MA, Stanley JK, Fahmy NR (1992) Lipids and Dupuytren's disease. *Journal of Bone & Joint Surgery - British Volume* 74: 923–927.
13. Hart MG, Hooper G (2005) Clinical associations of Dupuytren's disease. *Postgraduate Medical Journal* 81: 425–428.
14. Livingstone JA, Field J (1999) Algodystrophy and its association with Dupuytren's disease. *Journal of Hand Surgery* 24 B: 199–202.
15. Liss GM, Stock SR (1996) Can Dupuytren's contracture be work-related?: review of the evidence. *American Journal of Industrial Medicine* 29: 521–532.
16. Degreef I, Steeno P, De Smet L (2008) A survey of clinical manifestations and risk factors in women with Dupuytren's disease. *Acta Orthopaedica Belgica* 74: 456–460.
17. Murrell GAC, Hueston JT (1990) Review article: Aetiology of Dupuytren's contracture. *Australian and New Zealand Journal of Surgery* 60: 247–252.
18. Tomasek JJ, Vaughan MB, Haaksma CJ (1999) Cellular structure and biology of Dupuytren's disease. *Hand Clinics* 15: 21–34.
19. Brickley-Parsons D, Glimcher MJ, Smith RJ (1981) Biochemical changes in the collagen of the palmar fascia in patients with Dupuytren's disease. *Journal of Bone and Joint Surgery - Series A* 63: 787–797.
20. Tomasek JJ, Gabbiani G, Hinz B, Chaponnier C, Brown A (2002) Myofibroblasts and mechano-regulation of connective tissue remodelling. *Nature Reviews Molecular Cell Biology* 3: 349–363.
21. Rayan GM (2007) Dupuytren's disease: anatomy, pathology, presentation, and treatment. *Instructional Course Lectures* 56: 101–111.
22. Thomas A, Bayat A (2010) The emerging role of Clostridium histolyticum collagenase in the treatment of Dupuytren disease. *Ther Clin Risk Manag* 6: 557–572.
23. Bayat A (2010) Connective tissue diseases: A nonsurgical therapy for Dupuytren disease. *Nat Rev Rheumatol* 6: 7–8.
24. Desai SS, Hentz VR (2010) Collagenase clostridium histolyticum for Dupuytren's contracture. *Expert Opinion on Biological Therapy* 10: 1395–1404.
25. Matsushita O, Koide T, Kobayashi R, Nagata K, Okabe A (2001) Substrate Recognition by the Collagen-binding Domain of Clostridium histolyticum Class I Collagenase. *Journal of Biological Chemistry* 276: 8761–8770.
26. Steinbrink DR, Bond MD, Van Wart HE (1985) Substrate specificity of beta-collagenase from Clostridium histolyticum. *Journal of Biological Chemistry* 260: 2771–2776.
27. Matsushita O, Jung CM, Katayama S, Minami J, Takahashi Y, et al. (1999) Gene duplication and multiplicity of collagenases in Clostridium histolyticum. *Journal of Bacteriology* 181: 923–933.
28. Mookhtiar KA, Van Wart HE (1992) Clostridium histolyticum collagenases: a new look at some old enzymes. *Matrix (Stuttgart, Germany) Supplement 1*: 116–126.
29. Mallya SK, Mookhtiar KA, Van Wart HE (1992) Kinetics of hydrolysis of type I, II, and III collagens by the class I and II Clostridium histolyticum collagenases. *Journal of Protein Chemistry* 11: 99–107.
30. French MF, Bhowan A, Van Wart HE (1992) Limited proteolysis of types I, II and III collagens at hyper-reactive sites by Clostridium histolyticum collagenase. *Matrix (Stuttgart, Germany) Supplement 1*: 134–135.
31. Watt AJ, Curtin CM, Hentz VR (2010) Collagenase Injection as Nonsurgical Treatment of Dupuytren's Disease: 8-Year Follow-Up. *Journal of Hand Surgery* 35: 534–539.
32. Hurst LC, Badalamente MA, Hentz VR, Hotchkiss RN, Kaplan FTD, et al. (2009) Injectable collagenase clostridium histolyticum for Dupuytren's contracture. *New England Journal of Medicine* 361: 968–979.
33. Starkweather KD, Lattuga S, Hurst LC, Badalamente MA, Guilak F, et al. (1996) Collagenase in the treatment of Dupuytren's disease: An in vitro study. *The Journal of Hand Surgery* 21: 490–495.
34. Badalamente MA, Hurst LC (2000) Enzyme injection as nonsurgical treatment of Dupuytren's disease. *The Journal of Hand Surgery* 25: 629–636.
35. Badalamente MA, Hurst LC, Hentz VR (2002) Collagen as a clinical target: Nonoperative treatment of Dupuytren's disease. *Journal of Hand Surgery* 27: 788–798.
36. Pharmaceuticals A (2009) Briefing Document for Collagenase Clostridium Histolyticum (AA4500) in the Treatment of Advanced Dupuytren's Disease (for United States FDA Arthritis Advisory Committee Meeting). In: Committee AA, ed. Washington DC.
37. Van der Rest M, Garrone R (1991) Collagen family of proteins. *FASEB J* 5: 2814–2823.
38. Prockop DJ, Kivirikko KI (1995) Collagens: molecular biology, diseases, and potentials for therapy. *Annu Rev Biochem* 64: 403–434.
39. Gelse K, Poschl E, Aigner T (2003) Collagens—structure, function, and biosynthesis. *Adv Drug Deliv Rev* 55: 1531–1546.
40. Ricard-Blum S, Ruggiero F (2005) The collagen superfamily: from the extracellular matrix to the cell membrane. *Pathol Biol (Paris)* 53: 430–442.
41. Bazin S, Lelouet M, Duance VC, Sims TJ, Bailey AJ, Gabbiani G, D'Andrion G, Pizzoloto G, Browne A, Nicoletis C, Delaunay A (1980) Biochemistry and histology of the connective tissue of Dupuytren's disease lesions. *European Journal of Clinical Investigation* 10: 9–16.
42. Murrell GA, Francis MJ, Howlett CR (1989) Dupuytren's contracture. Fine structure in relation to aetiology. *Journal of Bone & Joint Surgery - British Volume* 71: 367–373.
43. Murrell GA, Francis MJ, Bromley L (1987) Free radicals and Dupuytren's contracture. *British Medical Journal Clinical Research Ed* 295: 1373–1375.
44. Del Carlo M, Cole AA, Hart SGE, Levine LA (2009) Comparative analysis of collagen degradation in Peyronie's Disease plaque and Dupuytren's contracture cord tissues injected with mixed collagenase subtypes. *The Journal of urology* 181: 279–279.
45. Hindocha S, Iqbal SA, Farhatullah S, Paus R, Bayat A (2010) Characterization of stem cells in Dupuytren's disease. *Br J Surg* 98: 308–315.
46. Duong HS, Zhang Q, Kobi A, Le A, Messadi DV (2005) Assessment of Morphological and Immunohistological Alterations in Long-Term Keloid Skin Explants. *Cells Tissues Organs* 181: 89–102.
47. Lu Z, Hasse S, Bodo E, Rose C, Funk W, et al. (2007) Towards the development of a simplified long-term organ culture method for human scalp skin and its appendages under serum-free conditions. *Experimental dermatology* 16: 37–44.
48. Xing JZ, Zhu L, Jackson JA, Gabos S, Sun XJ, et al. (2005) Dynamic monitoring of cytotoxicity on microelectronic sensors. *Chem Res Toxicol* 18: 154–161.
49. Atienza JM, Zhu J, Wang X, Xu X, Abassi Y (2005) Dynamic monitoring of cell adhesion and spreading on microelectronic sensor arrays. *Journal of biomolecular screening* 10: 795–805.
50. Syed F, Ahmadi E, Iqbal SA, Singh S, McGrouther DA, et al. (2010) Fibroblasts from the growing margin of keloid scars produce higher levels of collagen I and III expression compared to intra- and extra-lesional sites: clinical implications for lesional site-directed therapy. *Br J Dermatol* 164: 83–96.
51. Sebastian A, Syed F, McGrouther DA, Colthurst J, Paus R, et al. (2010) A novel in vitro assay for electrophysiological research on human skin fibroblasts: Degenerate electrical waves downregulate collagen I expression in keloid fibroblasts. *Experimental dermatology* 20: 64–68.
52. Olive DM (2004) Quantitative methods for the analysis of protein phosphorylation in drug development. *Expert review of proteomics* 1: 327–341.
53. Chen H, Kovar J, Sissons S, Cox K, Matter W, et al. (2005) A cell-based immunocytochemical assay for monitoring kinase signaling pathways and drug efficacy. *Analytical biochemistry* 338: 136–142.
54. Hannoush RN (2008) Kinetics of Wnt-driven b-catenin stabilization revealed by quantitative and temporal imaging. *PLoS one* 3: e3498.
55. Bateman JF, Mascara T, Chan D, Cole WG (1984) Abnormal type I collagen metabolism by cultured fibroblasts in lethal perinatal osteogenesis imperfecta. *Biochem J* 217: 103–115.
56. Gabbiani GA, D (1985) The myofibroblasts in Dupuytren's disease and other fibromatoses. In: R. HJTaT, ed. Dupuytren's Disease. 2nd ed. Edinburgh: Churchill Livingstone. pp 86–93.
57. Murrell GA, Francis MJ, Bromley L (1991) The collagen changes of Dupuytren's contracture. *J Hand Surg Br* 16: 263–266.
58. Rehman S, Salway F, Stanley JK, Ollier WE, Day P, et al. (2008) Molecular phenotypic descriptors of Dupuytren's disease defined using informatics analysis of the transcriptome. *J Hand Surg Am* 33: 359–372.
59. Howard JC, Varallo VM, Ross DC, Faber KJ, Roth JH, et al. (2004) Wound healing-associated proteins Hsp47 and fibronectin are elevated in Dupuytren's contracture. *J Surg Res* 117: 232–238.
60. Dave SA, Banducci DR, Graham WP, 3rd, Allison GM, Ehrlich HP (2001) Differences in alpha smooth muscle actin expression between fibroblasts derived from Dupuytren's nodules or cords. *Exp Mol Pathol* 71: 147–155.
61. Hindman HB, Marty-Roix R, Tang JB, Jupiter JB, Simmons BP, et al. (2003) Regulation of expression of alpha-smooth muscle actin in cells of Dupuytren's contracture. *Journal of Bone & Joint Surgery - British Volume* 85: 448–455.
62. Verjee LS, Midwood K, Davidson D, Essex D, Sandison A, et al. (2009) Myofibroblast distribution in Dupuytren's cords: correlation with digital contracture. *J Hand Surg Am* 34: 1785–1794.
63. Verjee LS, Midwood K, Davidson D, Eastwood M, Nanchahal J (2010) Post-transcriptional regulation of alpha-smooth muscle actin determines the contractile phenotype of Dupuytren's nodular cells. *J Cell Physiol* 224: 681–690.
64. Shih B, Wijeratne D, Armstrong DJ, Lindau T, Day P, et al. (2009) Identification of Biomarkers in Dupuytren's Disease by Comparative Analysis of Fibroblasts Versus Tissue Biopsies in Disease-Specific Phenotypes. *The Journal of Hand Surgery* 34: 124–136.
65. Zhang AY, Fong KD, Pham H, Nacamuli RP, Longaker MT, et al. (2008) Gene expression analysis of Dupuytren's disease: the role of TGF-beta2. *J Hand Surg Eur Vol* 33: 783–790.
66. Baird KS, Crossan JF, Ralston SH (1993) Abnormal growth factor and cytokine expression in Dupuytren's contracture. *J Clin Pathol* 46: 425–428.
67. Badalamente MA, Hurst LC, Grandia SK, Sampson SP (1992) Platelet-derived growth factor in Dupuytren's disease. *J Hand Surg Am* 17: 317–323.

68. Igarashi A, Nashiro K, Kikuchi K, Sato S, Ihn H, et al. (1996) Connective tissue growth factor gene expression in tissue sections from localized scleroderma, keloid, and other fibrotic skin disorders. *Journal of Investigative Dermatology* 106: 729–733.
69. Bisson MA, McGrouther DA, Mudera V, Grobbelaar AO (2003) The different characteristics of Dupuytren's disease fibroblasts derived from either nodule or cord: Expression of  $\alpha$ -smooth muscle actin and the response to stimulation by TGF- $\beta$ 1. *Journal of Hand Surgery* 28 B: 351–356.
70. Murrell G, Francis M, Bromley L (1990) Modulation of fibroblast proliferation by oxygen free radicals. *Biochem J* 265: 659–665.
71. Baird KS, Crossan JF, Ralston SH (1993) Abnormal growth factor and cytokine expression in Dupuytren's contracture. *Journal of Clinical Pathology* 46: 425–428.
72. Terek RM, Jiranek WA, Goldberg MJ, Wolfe HJ, Alman BA (1995) The expression of platelet-derived growth-factor gene in Dupuytren contracture. *J Bone Joint Surg Am* 77: 1–9.
73. Pilcher BK, Dumin JA, Sudbeck BD, Krane SM, Welgus HG, et al. (1997) The activity of collagenase-1 is required for keratinocyte migration on a type I collagen matrix. *J Cell Biol* 137: 1445–1457.
74. Riley KN, Herman IM (2005) Collagenase promotes the cellular responses to injury and wound healing in vivo. *J Burns Wounds* 4: e8.
75. Shi L, Ermis R, Garcia A, Telgenhoff D, Aust D (2010) Degradation of human collagen isoforms by *Clostridium* collagenase and the effects of degradation products on cell migration. *Int Wound J* 7: 87–95.
76. Badalamente MA, Hurst LC (2007) Efficacy and Safety of Injectable Mixed Collagenase Subtypes in the Treatment of Dupuytren's Contracture. *Journal of Hand Surgery* 32: 767–774.
77. Hurst LC, Badalamente M, Smith T (2009) The authors reply. *New England Journal of Medicine* 361: 2579–2580.
78. Jung C MO, Katayama S, et al. (1999) Identification of metal ligands in the *Clostridia histolyticum* ColH Collagenase. *J Bacteriology* 181: 2816–2822.
79. Kim HA, Suh DI, Song YW (2001) Relationship between chondrocyte apoptosis and matrix depletion in human articular cartilage. *J Rheumatol* 28: 2038–2045.
80. Atkinson RK, Wright LG (1992) The involvement of collagenase in the necrosis induced by the bites of some spiders. *Comp Biochem Physiol C* 102: 125–128.
81. Herrmann H, Dessau W, Fessler LI, Von Der Mark K (1980) Synthesis of Types I, III and AB, Collagen by Chick Tendon Fibroblasts in vitro.. *European Journal of Biochemistry* 105: 63–74.
82. Al-Qattan MM (2006) Factors in the pathogenesis of Dupuytren's contracture. *Journal of Hand Surgery - American Volume* 31: 1527–1534.
