# Supplementary material for: In Vitro Study of Novel Collagenase (XIAFLEX®) on Dupuytren's Disease Fibroblasts Displays Unique Drug Related Properties
Source: PLOS journal article supplement (doi:10.1371/journal.pone.0031430), 2012-02-24
Supplement: S15 (10.1371/journal.pone.0031430.s015) [file journal.pone.0031430.s015]

**Supplementary Tables**

**Supplementary Table S3.**

| **Antibody** | **Raised Species** | **Isotype** | **Active against** | **Conjugate** | **Dilution** | **Product Code** | **Source** |
| --- | --- | --- | --- | --- | --- | --- | --- |
| Goat Anti-mouse | Goat | IgG | Mouse | HRP | 1:1000 | 172-1011 | Bio-Rad |
| Goat Anti-Rabbit | Goat | IgG | Rabbit | HRP | 1:1000 | 172-1019 | Bio-Rad |
| Donkey anti mouse  IRDye 800CW® | Donkey | IgG | Mouse | 800 | 1:800 | 926-32212 | Li-Core |
| Donkey anti rabbit  IRDye 800CW® | Donkey | IgG | Rabbit | 800 | 1:800 | 926-32213 | Li-core |
| Donkey anti mouse  IRDye 680CW® | Donkey | IgG | Mouse | 680 | 1:800 | 926-32222 | Li-Core |
| Donkey anti rabbit  IRDye 680CW® | Donkey | IgG | Rabbit | 680 | 1:800 | 926-32223 | Li-Core |
